# Supplementary material
Source: PubMed Central journal article supplement (PMC5078711)
Supplement: jcsm.12.11.1549s1.pdf [file jcsm.12.11.1549s1.pdf]

## LITERATURE SEARCH TERMS

| Category             | Search Term                            |                         |              |
|----------------------|----------------------------------------|-------------------------|--------------|
| Sleep Duration       | Napping                                | [All fields]            |              |
|                      | Sleep debt                             | [All fields]            |              |
|                      | Short sleep                            | [All fields]            |              |
|                      | Long sleep                             | [All fields]            |              |
|                      | Sleep deprivation                      | [All fields]            |              |
|                      | Insufficient sleep syndrome            | [All fields]            |              |
|                      | Excessive sleep                        | [All fields]            |              |
|                      | Sleep curtailment                      | [All fields]            |              |
|                      | Sleep length                           | [All fields]            |              |
|                      | Sleep need                             | [All fields]            |              |
|                      | Sleep duration                         | [All fields]            |              |
|                      | Sleep deficiency                       | [All fields]            |              |
|                      | Cancer                                 | Neoplasms               | [MeSH terms] |
|                      | Cardiovascular Health                  | Cardiovascular diseases | [MeSH terms] |
| Heart valves         |                                        | [MeSH terms]            |              |
| Heart valve diseases |                                        | [MeSH terms]            |              |
| Blood pressure       |                                        | [MeSH terms]            |              |
| Developmental Health | Child Development Disorders, Pervasive | [MeSH terms]            |              |
|                      | Academic performance                   | [All fields]            |              |
|                      | Behavior                               | [MeSH terms]            |              |
|                      | Psychology, educational                | [MeSH terms]            |              |
|                      | Personality                            | [MeSH terms]            |              |
|                      | Learning                               | [MeSH terms]            |              |
|                      | Attention                              | [MeSH terms]            |              |
|                      | School start time                      | [All fields]            |              |
|                      | Neuropsychological tests               | [MeSH terms]            |              |
|                      | Neuropsycholo*                         | [All fields]            |              |
|                      | Neurocognitive                         | [All fields]            |              |
|                      | Neurobehavioral                        | [All fields]            |              |
|                      | Emotional regulation                   | [All fields]            |              |
|                      | Language                               | [MeSH terms]            |              |
| Socialization        | [MeSH terms]                           |                         |              |

| Category          | Search Term                              |              |
|-------------------|------------------------------------------|--------------|
| Human Performance | Function                                 | [All fields] |
|                   | Activities of daily living               | [MeSH terms] |
|                   | Alertness                                | [All fields] |
|                   | Cognition                                | [MeSH terms] |
|                   | Patient safety                           | [All fields] |
|                   | Patient harms                            | [All fields] |
|                   | Accidents                                | [MeSH terms] |
|                   | Accident proneness                       | [MeSH terms] |
|                   | Fatigue                                  | [MeSH terms] |
|                   | Vigilance                                | [All fields] |
|                   | Psychomotor performance                  | [MeSH terms] |
|                   | Reaction                                 | [All fields] |
|                   | Comprehension                            | [MeSH terms] |
|                   | Confusion                                | [MeSH terms] |
|                   | Impairment                               | [All fields] |
|                   | Sleepiness<br><i>NOT sleep disorders</i> | [All fields] |
|                   | Sleep satisfaction                       | [All fields] |
|                   | Achievement                              | [MeSH terms] |
|                   | Athletic performance                     | [MeSH terms] |
|                   | Automobile driving                       | [MeSH terms] |

| Category           | Search Term                      |              |
|--------------------|----------------------------------|--------------|
| General Health     | Epidemiology                     | [MeSH terms] |
|                    | Prevention medicine              | [MeSH terms] |
|                    | Emergencies                      | [All fields] |
|                    | Endemic diseases                 | [All fields] |
|                    | Environmental medicine           | [All fields] |
|                    | Environmental microbiology       | [MeSH terms] |
|                    | Disease transmission, infectious | [MeSH terms] |
|                    | Environmental pollution          | [MeSH terms] |
|                    | Public health practice           | [MeSH terms] |
|                    | Wellness                         | [All fields] |
|                    | Well-being                       | [All fields] |
|                    | Quality of life                  | [MeSH terms] |
|                    | Wounds and Injuries              | [MeSH terms] |
|                    | Immunological Health             | Inflammation |
| Autoimmune disease |                                  | [MeSH terms] |
| Cytokines          |                                  | [MeSH terms] |
| Leukocytes         |                                  | [MeSH terms] |
| Phagocytes         |                                  | [MeSH terms] |
| Immunoproteins     |                                  | [MeSH terms] |
| Vaccination        |                                  | [MeSH terms] |
| Asthma             |                                  | [MeSH terms] |
| Common cold        |                                  | [MeSH terms] |
| Infection          |                                  | [MeSH terms] |
| Longevity          |                                  | Death        |
|                    | Survival                         | [MeSH terms] |
|                    | Vital statistics                 | [MeSH terms] |
|                    | Suicide                          | [MeSH terms] |

| Category          | Search Term                                         |              |
|-------------------|-----------------------------------------------------|--------------|
| Mental Health     | Mental Health                                       | [MeSH terms] |
|                   | Depression                                          | [MeSH terms] |
|                   | Psychiatry                                          | [MeSH terms] |
|                   | Anxiety disorders                                   | [MeSH terms] |
|                   | Mood disorders                                      | [MeSH terms] |
|                   | Schizophrenia and disorders with psychotic features | [MeSH terms] |
|                   | Substance-related disorders                         | [MeSH terms] |
|                   | Mental Disorders Diagnosed in Childhood             | [MeSH terms] |
|                   | Attention Deficit and Disruptive Behavior Disorders | [MeSH terms] |
|                   | Eating disorders                                    | [MeSH terms] |
|                   | Emotions                                            | [MeSH terms] |
|                   | Metabolic Health                                    | Metabolism   |
| Body weight       |                                                     | [MeSH terms] |
| Metabolic disease |                                                     | [MeSH terms] |
| Insulin           |                                                     | [MeSH terms] |
| Orexins           |                                                     | [MeSH terms] |
| Ghrelin           |                                                     | [MeSH terms] |
| Adipokines        |                                                     | [MeSH terms] |
| Waist-hip ratio   |                                                     | [MeSH terms] |
| Thyroid gland     |                                                     | [MeSH terms] |
| Pediatric obesity |                                                     | [MeSH terms] |
| Pain              |                                                     | Pain         |
|                   | Nociception                                         | [MeSH terms] |
|                   | Rheumatic diseases                                  | [MeSH terms] |

## REFERENCE LIST OF FINAL EVIDENCE

### Cardiovascular Health

- Au CT, Ho CK, Wing YK, Lam HS, Li AM. Acute and chronic effects of sleep duration on blood pressure. *Pediatrics*. 2014 Jan;133(1):e64-72.
- Azadbakht L, Kelishadi R, Khodarahmi M, Qorbani M, Heshmat R, Motlagh ME, Taslimi M, Ardalan G. The association of sleep duration and cardiometabolic risk factors in a national sample of children and adolescents: the CASPIAN III study. *Nutrition*. 2013 Sep;29(9):1133-41.
- Berentzen NE, Smit HA, Bekkers MB, Brunekreef B, Koppelman GH, De Jongste JC, Kerkhof M, Van Rossem L, Wijga AH. Time in bed, sleep quality and associations with cardiometabolic markers in children: the Prevention and Incidence of Asthma and Mite Allergy birth cohort study. *J Sleep Res*. 2014 Feb;23(1):3-12.
- Countryman AJ, Saab PG, Llabre MM, Penedo FJ, McCalla JR, Schneiderman N. Cardiometabolic risk in adolescents: associations with physical activity, fitness, and sleep. *Ann Behav Med*. 2013 Feb;45(1):121-31.
- Guo X, Zheng L, Li Y, Yu S, Liu S, Zhou X, Zhang X, Sun Z, Wang R, Sun Y. Association between sleep duration and hypertension among Chinese children and adolescents. *Clin Cardiol*. 2011 Dec;34(12):774-81.
- Javaheri S, Storfer-Isser A, Rosen CL, Redline S. Sleep quality and elevated blood pressure in adolescents. *Circulation*. 2008 Sep 2;118(10):1034-40.
- Kuciene R, Dulskiene V. Associations of short sleep duration with prehypertension and hypertension among Lithuanian children and adolescents: a cross-sectional study. *BMC Public Health*. 2014 Mar 15;14:255.
- Lee JA, Park HS. Relation between sleep duration, overweight, and metabolic syndrome in Korean adolescents. *Nutr Metab Cardiovasc Dis*. 2014 Jan;24(1):65-71.
- Lehto R, Ray C, Lahti-Koski M, Roos E. Health behaviors, waist circumference and waist-to-height ratio in children. *Eur J Clin Nutr*. 2011 Jul;65(7):841-8.
- Mahler B, Kamperis K, Schroeder M, Frøkiær J, Djurhuus JC, Rittig S. Sleep deprivation induces excess diuresis and natriuresis in healthy children. *Am J Physiol Renal Physiol*. 2012 Jan 15;302(2):F236-43.
- Martikainen S, Pesonen AK, Feldt K, Jones A, Lahti J, Pyhälä R, Heinonen K, Kajantie E, Eriksson J, Räikkönen K. Poor sleep and cardiovascular function in children. *Hypertension*. 2011 Jul;58(1):16-21.
- Martinez-Gomez D, Eisenmann JC, Gomez-Martinez S, Hill EE, Zapatera B, Veiga OL, Marcos A; AFINOS Study Group. Sleep duration and emerging cardiometabolic risk markers in adolescents. The AFINOS study. *Sleep Med*. 2011 Dec;12(10):997-1002.
- Meininger JC, Gallagher MR, Eissa MA, Nguyen TQ, Chan W. Sleep duration and its association with ambulatory blood pressure in a school-based, diverse sample of adolescents. *Am J Hypertens*. 2014 Jul;27(7):948-55.
- Paciência I, Barros H, Araújo J, Ramos E. Association between sleep duration and blood pressure in adolescents. *Hypertens Res*. 2013 Aug;36(8):747-52.
- Peach H, Gaultney JF, Reeve CL. Sleep characteristics, body mass index, and risk for hypertension in young adolescents. *J Youth Adolesc*. 2015 Feb;44(2):271-84.
- Rey-López JP, de Carvalho HB, de Moraes AC, Ruiz JR, Sjöström M, Marcos A, Polito A, Gottrand F, Manios Y, Kafatos A, Molnar D, Widhalm K, De Henauw S, Moreno LA; HELENA study. Sleep time and cardiovascular risk factors in adolescents: the HELENA (Healthy Lifestyle in Europe by Nutrition in Adolescence) study. *Sleep Med*. 2014 Jan;15(1):104-10.
- Sampei M, Murata K, Dakeishi M, Wood DC. Cardiac autonomic hypofunction in preschool children with short nocturnal sleep. *Tohoku J Exp Med*. 2006 Mar;208(3):235-42.
- Sampei M, Dakeishi M, Wood DC, Murata K. Impact of total sleep duration on blood pressure in preschool children. *Biomed Res*. 2006 Jun;27(3):111-5.
- Sung V, Beebe DW, Vandyke R, Fenchel MC, Crimmins NA, Kirk S, Hiscock H, Amin R, Wake M. Does sleep duration predict metabolic risk in obese adolescents attending tertiary services? A cross-sectional study. *Sleep*. 2011 Jul 1;34(7):891-8.
- Wells JC, Hallal PC, Reichert FF, Menezes AM, Araújo CL, Victora CG. Sleep patterns and television viewing in relation to obesity and blood pressure: evidence from an adolescent Brazilian birth cohort. *Int J Obes (Lond)*. 2008 Jul;32(7):1042-9.

### Developmental Health

- Abe T, Hagihara A, Nobutomo K. Sleep patterns and impulse control among Japanese junior high school students. *J Adolesc*. 2010 Oct;33(5):633-41.
- Adolescent Sleep Working Group; Committee on Adolescence; Council on School Health. School start times for adolescents. *Pediatrics*. 2014 Sep;134(3):642-9.
- Agras WS, Hammer LD, McNicholas F, Kraemer HC. Risk factors for childhood overweight: a prospective study from birth to 9.5 years. *J Pediatr*. 2004 Jul;145(1):20-5. Erratum in: *J Pediatr*. 2004 Sep;145(3):424.
- Aishworiya R, Chan P, Kiing J, Chong SC, Laino AG, Tay SKh. Sleep behaviour in a sample of preschool children in Singapore. *Ann Acad Med Singapore*. 2012 Mar;41(3):99-104.
- Al-Hazzaa HM, Musaiger AO, Abahussain NA, Al-Sobayel HI, Qahwaji DM. Lifestyle correlates of self-reported sleep duration among Saudi adolescents: a multicentre school-based cross-sectional study. *Child Care Health Dev*. 2014 Jul;40(4):533-42.
- Anderson B, Storfer-Isser A, Taylor HG, Rosen CL, Redline S. Associations of executive function with sleepiness and sleep duration in adolescents. *Pediatrics*. 2009 Apr;123(4):e701-7.
- Androutsos O, Moschonis G, Mavrogianni C, Roma-Giannikou E, Chrousos GP, Kanaka-Gantenbein C, Manios Y. Identification of lifestyle patterns, including sleep deprivation, associated with insulin resistance in children: the Healthy Growth Study. *Eur J Clin Nutr*. 2014 Mar;68(3):344-9.

- Anuntaseree W, Mo-suwan L, Vasiknanonte P, Kuasirikul S, Ma-a-lee A, Choprapawan C. Night waking in Thai infants at 3 months of age: association between parental practices and infant sleep. *Sleep Med.* 2008 Jul;9(5):564-71.
- Appelhans BM, Fitzpatrick SL, Li H, Cail V, Waring ME, Schneider KL, Whited MC, Busch AM, Pagoto SL. The home environment and childhood obesity in low-income households: indirect effects via sleep duration and screen time. *BMC Public Health.* 2014 Nov 9;14:1160.
- Arakawa M, Taira K, Tanaka H, Yamakawa K, Toguchi H, Kadekaru H, Yamamoto Y, Uezu E, Shirakawa S. A survey of junior high school students' sleep habit and lifestyle in Okinawa. *Psychiatry Clin Neurosci.* 2001 Jun;55(3):211-2.
- Aronen ET, Paavonen EJ, Fällberg M, Soininen M, Törrönen J. Sleep and psychiatric symptoms in school-age children. *J Am Acad Child Adolesc Psychiatry.* 2000 Apr;39(4):502-8.
- Arora T, Taheri S. Associations among late chronotype, body mass index and dietary behaviors in young adolescents. *Int J Obes (Lond).* 2015 Jan;39(1):39-44.
- Arora T, Hosseini-Araghi M, Bishop J, Yao GL, Thomas GN, Taheri S. The complexity of obesity in U.K. adolescents: relationships with quantity and type of technology, sleep duration and quality, academic performance and aspiration. *Pediatr Obes.* 2013 Oct;8(5):358-66.
- Asaka Y, Takada S. Activity-based assessment of the sleep behaviors of VLBW preterm infants and full-term infants at around 12 months of age. *Brain Dev.* 2010 Feb;32(2):150-5.
- Asarnow LD, McGlinchey E, Harvey AG. The effects of bedtime and sleep duration on academic and emotional outcomes in a nationally representative sample of adolescents. *J Adolesc Health.* 2014 Mar;54(3):350-6.
- Astill RG, Van der Heijden KB, Van Ijzendoorn MH, Van Someren EJ. Sleep, cognition, and behavioral problems in school-age children: a century of research meta-analyzed. *Psychol Bull.* 2012 Nov;138(6):1109-38.
- BaHammam A, Bin Saeed A, Al-Faris E, Shaikh S. Sleep duration and its correlates in a sample of Saudi elementary school children. *Singapore Med J.* 2006 Oct;47(10):875-81.
- Ball GD, Lenk JM, Barbarich BN, Plotnikoff RC, Fishburne GJ, Mackenzie KA, Willows ND. Overweight children and adolescents referred for weight management: are they meeting lifestyle behaviour recommendations? *Appl Physiol Nutr Metab.* 2008 Oct;33(5):936-45.
- Barnes JC, Meldrum RC. The impact of sleep duration on adolescent development: a genetically informed analysis of identical twin pairs. *J Youth Adolesc.* 2015 Feb;44(2):489-506.
- Baum KT, Desai A, Field J, Miller LE, Rausch J, Beebe DW. Sleep restriction worsens mood and emotion regulation in adolescents. *J Child Psychol Psychiatry.* 2014;55(2):180-90.
- Beebe DW, Simon S, Summer S, Hemmer S, Strotman D, Dolan LM. Dietary intake following experimentally restricted sleep in adolescents. *Sleep.* 2013 Jun 1;36(6):827-34.
- Beebe DW, Ris MD, Kramer ME, Long E, Amin R. The association between sleep disordered breathing, academic grades, and cognitive and behavioral functioning among overweight subjects during middle to late childhood. *Sleep.* 2010 Nov;33(11):1447-56.
- Beebe DW, Rose D, Amin R. Attention, learning, and arousal of experimentally sleep-restricted adolescents in a simulated classroom. *J Adolesc Health.* 2010 Nov;47(5):523-5.
- Beebe DW, Fallone G, Godiwala N, Flanigan M, Martin D, Schaffner L, Amin R. Feasibility and behavioral effects of an at-home multi-night sleep restriction protocol for adolescents. *J Child Psychol Psychiatry.* 2008 Sep;49(9):915-23.
- Bel S, Michels N, De Vriendt T, Patterson E, Cuenca-García M, Diethelm K, Gutin B, Grammatikaki E, Manios Y, Leclercq C, Ortega FB, Moreno LA, Gottrand F, Gonzalez-Gross M, Widhalm K, Kafatos A, Garaulet M, Molnar D, Kaufman JM, Gilbert CC, Hallström L, Sjöström M, et al. Association between self-reported sleep duration and dietary quality in European adolescents. *Br J Nutr.* 2013 Sep 14;110(5):949-59.
- Berger RH, Miller AL, Seifer R, Cares SR, LeBourgeois MK. Acute sleep restriction effects on emotion responses in 30- to 36-month-old children. *J Sleep Res.* 2012 Jun;21(3):235-46.
- Bertelle V, Sevestre A, Laou-Hap K, Nagahapitiye MC, Sizun J. Sleep in the neonatal intensive care unit. *J Perinat Neonatal Nurs.* 2007 Apr-Jun;21(2):140-8; quiz 149-50. Review.
- Bertelle V, Mabin D, Adrien J, Sizun J. Sleep of preterm neonates under developmental care or regular environmental conditions. *Early Hum Dev.* 2005 Jul;81(7):595-600.
- Bibiloni Mdel M, Martinez E, Llull R, Juarez MD, Pons A, Tur JA. Prevalence and risk factors for obesity in Balearic Islands adolescents. *Br J Nutr.* 2010 Jan;103(1):99-106.
- Biggs SN, Lushington K, van den Heuvel CJ, Martin AJ, Kennedy JD. Inconsistent sleep schedules and daytime behavioral difficulties in school-aged children. *Sleep Med.* 2011 Sep;12(8):780-6.
- Bruni O, Baumgartner E, Sette S, Ancona M, Caso G, Di Cosimo ME, Mannini A, Ometto M, Pasquini A, Ulliana A, Ferri R. Longitudinal study of sleep behavior in normal infants during the first year of life. *J Clin Sleep Med.* 2014 Oct 15;10(10):1119-27.
- Bruni O, Russo PM, Ferri R, Novelli L, Galli F, Guidetti V. Relationships between headache and sleep in a non-clinical population of children and adolescents. *Sleep Med.* 2008 Jul;9(5):542-8.
- Buckhalt JA, El-Sheikh M, Keller P. Children's sleep and cognitive functioning: race and socioeconomic status as moderators of effects. *Child Dev.* 2007 Jan-Feb;78(1):213-31.
- Burt J, Dube L, Thibault L, Gruber R. Sleep and eating in childhood: a potential behavioral mechanism underlying the relationship between poor sleep and obesity. *Sleep Med.* 2014 Jan;15(1):71-5.

- Calamaro CJ, Park S, Mason TB, Marcus CL, Weaver TE, Pack A, Ratcliffe SJ. Shortened sleep duration does not predict obesity in adolescents. *J Sleep Res.* 2010 Dec;19(4):559-66
- Calamaro CJ, Mason TB, Ratcliffe SJ. Adolescents living the 24/7 lifestyle: effects of caffeine and technology on sleep duration and daytime functioning. *Pediatrics.* 2009 Jun;123(6):e1005-10.
- Capaldi Li VF, Handwerker K, Richardson E, Stroud LR. Associations between sleep and cortisol responses to stress in children and adolescents: a pilot study. *Behav Sleep Med.* 2005;3(4):177-92.
- Carskadon MA. Sleep's effects on cognition and learning in adolescence. *Prog Brain Res.* 2011;190:137-43.
- Carskadon MA, Wolfson AR, Acebo C, Tzischinsky O, Seifer R. Adolescent sleep patterns, circadian timing, and sleepiness at a transition to early school days. *Sleep.* 1998 Dec 15;21(8):871-81.
- Carvalho Bos S, Gomes A, Clemente V, Marques M, Pereira AT, Maia B, Soares MJ, Cabral AS, Macedo A, Gozal D, Azevedo MH. Sleep and behavioral/emotional problems in children: a population-based study. *Sleep Med.* 2009 Jan;10(1):66-74.
- Casoff J, Bhatti JA, Gruber R. The effect of sleep restriction on neurobehavioural functioning in normally developing children and adolescents: insights from the Attention, Behaviour and Sleep Laboratory. *Pathol Biol (Paris).* 2014 Oct;62(5):319-31.
- Chung KF, Cheung MM. Sleep-wake patterns and sleep disturbance among Hong Kong Chinese adolescents. *Sleep.* 2008 Feb;31(2):185-94.
- Cicek B, Ozturk A, Mazicioglu MM, Elmali F, Turp N, Kurtoglu S. The risk analysis of arm fat area in Turkish children and adolescents. *Ann Hum Biol.* 2009 Jan-Feb;36(1):28-37.
- Cortesi F, Giannotti F, Sebastiani T, Vagnoni C, Marioni P. Cosleeping versus solitary sleeping in children with bedtime problems: child emotional problems and parental distress. *Behav Sleep Med.* 2008;6(2):89-105
- Countryman AJ, Saab PG, Llabre MM, Penedo FJ, McCalla JR, Schneiderman N. Cardiometabolic risk in adolescents: associations with physical activity, fitness, and sleep. *Ann Behav Med.* 2013 Feb;45(1):121-31.
- Crosby B, LeBourgeois MK, Harsh J. Racial differences in reported napping and nocturnal sleep in 2- to 8-year-old children. *Pediatrics.* 2005 Jan;115(1 Suppl):225-32.
- Dahl RE. Biological, developmental, and neurobehavioral factors relevant to adolescent driving risks. *Am J Prev Med.* 2008 Sep;35(3 Suppl):S278-84.
- Dahl RE, Lewin DS. Pathways to adolescent health sleep regulation and behavior. *J Adolesc Health.* 2002 Dec;31(6 Suppl):175-84. Review.
- Davis AL, Avis KT, Schwebel DC. The effects of acute sleep restriction on adolescents' pedestrian safety in a virtual environment. *J Adolesc Health.* 2013 Dec;53(6):785-90.
- de Jong E, Stocks T, Visscher TL, HiraSing RA, Seidell JC, Renders CM. Association between sleep duration and overweight: the importance of parenting. *Int J Obes (Lond).* 2012 Oct;36(10):1278-84
- Dev DA, McBride BA, Fiese BH, Jones BL, Cho H; Behalf Of The Strong Kids Research Team. Risk factors for overweight/obesity in preschool children: an ecological approach. *Child Obes.* 2013 Oct;9(5):399-408.
- Dewald JF, Short MA, Gradisar M, Oort FJ, Meijer AM. The Chronic Sleep Reduction Questionnaire (CSRQ): a cross-cultural comparison and validation in Dutch and Australian adolescents. *J Sleep Res.* 2012 Oct;21(5):584-94.
- Dexter D, Bijwadia J, Schilling D, Applebaugh G. Sleep, sleepiness and school start times: a preliminary study. *WMJ.* 2003;102(1):44-6.
- Do YK, Shin E, Bautista MA, Foo K. The associations between self-reported sleep duration and adolescent health outcomes: what is the role of time spent on Internet use? *Sleep Med.* 2013 Feb;14(2):195-200.
- Doane LD, Thurston EC. Associations among sleep, daily experiences, and loneliness in adolescence: evidence of moderating and bidirectional pathways. *J Adolesc.* 2014 Feb;37(2):145-54.
- Dollman J, Ridley K, Olds T, Lowe E. Trends in the duration of school-day sleep among 10- to 15-year-old South Australians between 1985 and 2004. *Acta Paediatr.* 2007 Jul;96(7):1011-4.
- Dorofaeff TF, Denny S. Sleep and adolescence. Do New Zealand teenagers get enough? *J Paediatr Child Health.* 2006 Sep;42(9):515-20.
- Duncan JS, Schofield G, Duncan EK, Rush EC. Risk factors for excess body fatness in New Zealand children. *Asia Pac J Clin Nutr.* 2008;17(1):138-47.
- Eaton DK, McKnight-Eily LR, Lowry R, Perry GS, Presley-Cantrell L, Croft JB. Prevalence of insufficient, borderline, and optimal hours of sleep among high school students - United States, 2007. *J Adolesc Health.* 2010 Apr;46(4):399-401.
- El-Sheikh M, Buckhalt JA, Mark Cummings E, Keller P. Sleep disruptions and emotional insecurity are pathways of risk for children. *J Child Psychol Psychiatry.* 2007 Jan;48(1):88-96.
- Eisenburg LK, Corpeleijn E, van Sluijs EM, Atkin AJ. Clustering and correlates of multiple health behaviours in 9-10 year old children. *PLoS One.* 2014;9(6):e99498.
- Ertan P, Yilmaz O, Caglayan M, Sogut A, Aslan S, Yuksel H. Relationship of sleep quality and quality of life in children with monosymptomatic enuresis. *Child Care Health Dev.* 2009 Jul;35(4):469-74.
- Escribano C, Díaz-Morales JF. Daily fluctuations in attention at school considering starting time and chronotype: an exploratory study. *Chronobiol Int.* 2014 Jul;31(6):761-9.
- Fallone G, Acebo C, Seifer R, Carskadon MA. Experimental restriction of sleep opportunity in children: effects on teacher ratings. *Sleep.* 2005 Dec;28(12):1561-7.
- Fallone G, Acebo C, Arnedt JT, Seifer R, Carskadon MA. Effects of acute sleep restriction on behavior, sustained attention, and response inhibition in children. *Percept Mot Skills.* 2001 Aug;93(1):213-29.
- Firouzi S, Poh BK, Ismail MN, Sadeghilar A. Sleep habits, food intake, and physical activity levels in normal and overweight and obese Malaysian children. *Obes Res Clin Pract.* 2014 Jan-Feb;8(1):e70-8.

- Fitzgerald CT, Messias E, Buysse DJ. Teen sleep and suicidality: results from the youth risk behavior surveys of 2007 and 2009. *J Clin Sleep Med*. 2011 Aug 15;7(4):351-6.
- Fredriksen K, Rhodes J, Reddy R, Way N. Sleepless in Chicago: tracking the effects of adolescent sleep loss during the middle school years. *Child Dev*. 2004 Jan-Feb;75(1):84-95.
- Fukuda K, Ishihara K. Routine evening naps and night-time sleep patterns in junior high and high school students. *Psychiatry Clin Neurosci*. 2002 Jun;56(3):229-30.
- Gaina A, Sekine M, Hamanishi S, Chen X, Wang H, Yamagami T, Kagamimori S. Daytime sleepiness and associated factors in Japanese school children. *J Pediatr*. 2007 Nov;151(5):518-22, 522.e1-4.
- Garaulet M, Ortega FB, Ruiz JR, Rey-López JP, Béghin L, Manios Y, Cuenca-García M, Plada M, Diethelm K, Kafatos A, Molnár D, Al-Tahan J, Moreno LA. Short sleep duration is associated with increased obesity markers in European adolescents: effect of physical activity and dietary habits. The HELENA study. *Int J Obes (Lond)*. 2011 Oct;35(10):1308-17.
- Garmy P, Nyberg P, Jakobsson U. Sleep and television and computer habits of Swedish school-age children. *J Sch Nurs*. 2012 Dec;28(6):469-76.
- Gau SS, Shang CY, Merikangas KR, Chiu YN, Soong WT, Cheng AT. Association between morningness-eveningness and behavioral/emotional problems among adolescents. *J Biol Rhythms*. 2007 Jun;22(3):268-74.
- Geiger A, Achermann P, Jenni OG. Association between sleep duration and intelligence scores in healthy children. *Dev Psychol*. 2010 Jul;46(4):949-54.
- Giannotti F, Cortesi F, Cerquiglini A, Miraglia D, Vagnoni C, Sebastiani T, Bernabei P. An investigation of sleep characteristics, EEG abnormalities and epilepsy in developmentally regressed and non-regressed children with autism. *J Autism Dev Disord*. 2008 Nov;38(10):1888-97.
- Gibson ES, Powles AC, Thabane L, O'Brien S, Molnar DS, Trajanovic N, Ogilvie R, Shapiro C, Yan M, Chilcott-Tanser L. "Sleepiness" is serious in adolescence: two surveys of 3235 Canadian students." *BMC Public Health*. 2006 May 2;6:116.
- Golley RK, Maher CA, Matricciani L, Olds TS. Sleep duration or bedtime? Exploring the association between sleep timing behaviour, diet and BMI in children and adolescents. *Int J Obes (Lond)*. 2013 Apr;37(4):546-51.
- Gruber R, Cassoff J, Frenette S, Wiebe S, Carrier J. Impact of sleep extension and restriction on children's emotional lability and impulsivity. *Pediatrics*. 2012 Nov;130(5):e1155-61.
- Gruber R, Wiebe S, Montecalvo L, Brunetti B, Amsel R, Carrier J. Impact of sleep restriction on neurobehavioral functioning of children with attention deficit hyperactivity disorder. *Sleep*. 2011 Mar 1;34(3):315-23.
- Gruber R, Laviolette R, Deluca P, Monson E, Cornish K, Carrier J. Short sleep duration is associated with poor performance on IQ measures in healthy school-age children. *Sleep Med*. 2010 Mar;11(3):289-94.
- Guo X, Zheng L, Li Y, Yu S, Sun G, Yang H, Zhou X, Zhang X, Sun Z, Sun Y. Differences in lifestyle behaviors, dietary habits, and familial factors among normal-weight, overweight, and obese Chinese children and adolescents. *Int J Behav Nutr Phys Act*. 2012 Oct 2;9:120.
- Gössel-Symank R, Grimmer I, Korte J, Siegmund R. Actigraphic monitoring of the activity-rest behavior of preterm and full-term infants at 20 months of age. *Chronobiol Int*. 2004 Jul;21(4-5):661-71.
- Hagenauer MH, Perryman JI, Lee TM, Carskadon MA. Adolescent changes in the homeostatic and circadian regulation of sleep. *Dev Neurosci*. 2009;31(4):276-84.
- Haines J, McDonald J, O'Brien A, Sherry B, Bottino CJ, Schmidt ME, Taveras EM. Healthy Habits, Happy Homes: randomized trial to improve household routines for obesity prevention among preschool-aged children. *JAMA Pediatr*. 2013 Nov;167(11):1072-9.
- Harrington SA. Relationships of objectively measured physical activity and sleep with BMI and academic outcomes in 8-year-old children. *Appl Nurs Res*. 2013 May;26(2):63-70.
- Hart CN, Carskadon MA, Considine RV, Fava JL, Lawton J, Raynor HA, Jelalian E, Owens J, Wing R. Changes in children's sleep duration on food intake, weight, and leptin. *Pediatrics*. 2013 Dec;132(6):e1473-80.
- Hiscock H, Sciberras E, Mensah F, Gerner B, Efron D, Khano S, Oberklaid F. Impact of a behavioural sleep intervention on symptoms and sleep in children with attention deficit hyperactivity disorder, and parental mental health: randomised controlled trial. *BMJ*. 2015 Jan 20;350:h68.
- Hjorth MF, Chaput JP, Ritz C, Dalskov SM, Andersen R, Astrup A, Tetens I, Michaelsen KF, Sjödin A. Fatness predicts decreased physical activity and increased sedentary time, but not vice versa: support from a longitudinal study in 8- to 11-year-old children. *Int J Obes (Lond)*. 2014 Jul;38(7):959-65.
- Hjorth MF, Quist JS, Andersen R, Michaelsen KF, Tetens I, Astrup A, Chaput JP, Sjödin A. Change in sleep duration and proposed dietary risk factors for obesity in Danish school children. *Pediatr Obes*. 2014 Dec;9(6):e156-9.
- Hodge D, Carollo TM, Lewin M, Hoffman CD, Sweeney DP. Sleep patterns in children with and without autism spectrum disorders: developmental comparisons. *Res Dev Disabil*. 2014 Jul;35(7):1631-8.
- Holley S, Hill CM, Stevenson J. An hour less sleep is a risk factor for childhood conduct problems. *Child Care Health Dev*. 2011 Jul;37(4):563-70.
- Holm SM, Forbes EE, Ryan ND, Phillips ML, Tarr JA, Dahl RE. Reward-related brain function and sleep in pre/early pubertal and mid/late pubertal adolescents. *J Adolesc Health*. 2009 Oct;45(4):326-34.
- Honomichl RD, Goodlin-Jones BL, Burnham M, Gaylor E, Anders TF. Sleep patterns of children with pervasive developmental disorders. *J Autism Dev Disord*. 2002 Dec;32(6):553-61.
- Humphreys JS, Gringras P, Blair PS, Scott N, Henderson J, Fleming PJ, Emond AM. Sleep patterns in children with autistic spectrum disorders: a prospective cohort study. *Arch Dis Child*. 2014 Feb;99(2):114-8.

- Hupbach A, Gomez RL, Bootzin RR, Nadel L. Nap-dependent learning in infants. *Dev Sci*. 2009 Nov;12(6):1007-12.
- Hysing M, Harvey AG, Torgersen L, Ystrom E, Reichborn-Kjennerud T, Sivertsen B. Trajectories and predictors of nocturnal awakenings and sleep duration in infants. *J Dev Behav Pediatr*. 2014 Jun;35(5):309-16.
- Ikeda M, Kaneita Y, Kondo S, Itani O, Ohida T. Epidemiological study of sleep habits among four-and-a-half-year-old children in Japan. *Sleep Med*. 2012 Aug;13(7):787-94.
- Jang SI, Lee KS, Park EC. Relationship between current sleep duration and past suicidal ideation or attempt among Korean adolescents. *J Prev Med Public Health*. 2013 Nov;46(6):329-35.
- Jarrin DC, McGrath JJ, Drake CL. Beyond sleep duration: distinct sleep dimensions are associated with obesity in children and adolescents. *Int J Obes (Lond)*. 2013 Apr;37(4):552-8.
- Javaheri S, Storfer-Isser A, Rosen CL, Redline S. Association of short and long sleep durations with insulin sensitivity in adolescents. *J Pediatr*. 2011 Apr;158(4):617-23.
- Jiang X, Hardy LL, Baur LA, Ding D, Wang L, Shi H. Sleep duration, schedule and quality among urban Chinese children and adolescents: associations with routine after-school activities. *PLoS One*. 2015;10(1):e0115326.
- Kang SG, Lee YJ, Kim SJ, Lim W, Lee HJ, Park YM, Cho IH, Cho SJ, Hong JP. Weekend catch-up sleep is independently associated with suicide attempts and self-injury in Korean adolescents. *Compr Psychiatry*. 2014 Feb;55(2):319-25.
- Keller PS, El-Sheikh M, Buckhalt JA. Children's attachment to parents and their academic functioning: sleep disruptions as moderators of effects. *J Dev Behav Pediatr*. 2008 Dec;29(6):441-9.
- Kelly RJ, El-Sheikh M. Reciprocal relations between children's sleep and their adjustment over time. *Dev Psychol*. 2014 Apr;50(4):1137-47.
- Kim HS, Ham OK, Kim JW, Park JY. Association between sleep duration and psychological health in overweight and obese children in Korea. *Nurs Health Sci*. 2012 Jun;14(2):238-43.
- Kirjavainen J, Lehtonen L, Kirjavainen T, Kero P; 24-Hour Ambulatory Sleep Polygraphy study. Sleep of excessively crying infants: a 24-Hour Ambulatory Sleep Polygraphy study. *Pediatrics*. 2004 Sep;114(3):592-600.
- Kjeldsen JS, Hjorth MF, Andersen R, Michaelsen KF, Tetens I, Astrup A, Chaput JP, Sjodin A. Short sleep duration and large variability in sleep duration are independently associated with dietary risk factors for obesity in Danish school children. *Int J Obes (Lond)*. 2014 Jan;38(1):32-9.
- Kleiser C, Schaffrath Rosario A, Mensink GB, Prinz-Langenohl R, Kurth BM. Potential determinants of obesity among children and adolescents in Germany: results from the cross-sectional KiGGS Study. *BMC Public Health*. 2009 Feb 2;9:46.
- Klingenberg L, Chaput JP, Holmbäck U, Jennum P, Astrup A, Sjodin A. Sleep restriction is not associated with a positive energy balance in adolescent boys. *Am J Clin Nutr*. 2012 Aug;96(2):240-8.
- Kohyama J, Shiiki T, Ohinata-Sugimoto J, Hasegawa T. Potentially harmful sleep habits of 3-year-old children in Japan. *J Dev Behav Pediatr*. 2002 Apr;23(2):67-70.
- Komada Y, Abe T, Okajima I, Asaoka S, Matsuura N, Usui A, Shirakawa S, Inoue Y. Short sleep duration and irregular bedtime are associated with increased behavioral problems among Japanese preschool-age children. *Tohoku J Exp Med*. 2011;224(2):127-36.
- Kopasz M, Loessl B, Valerius G, Koenig E, Matthaeas N, Hornyak M, Kloepfer C, Nissen C, Riemann D, Voderholzer U. No persisting effect of partial sleep curtailment on cognitive performance and declarative memory recall in adolescents. *J Sleep Res*. 2010 Mar;19(1 Pt 1):71-9.
- Kopasz M, Loessl B, Hornyak M, Riemann D, Nissen C, Piosczyk H, Voderholzer U. Sleep and memory in healthy children and adolescents - a critical review. *Sleep Med Rev*. 2010 Jun;14(3):167-77.
- Kostyun RO, Milewski MD, Hafeez I. Sleep disturbance and neurocognitive function during the recovery from a sport-related concussion in adolescents. *Am J Sports Med*. 2015 Mar;43(3):633-40.
- Kouros CD, El-Sheikh M. Daily mood and sleep: reciprocal relations and links with adjustment problems. *J Sleep Res*. 2015 Feb;24(1):24-31.
- Kubiszewski V, Fontaine R, Potard C, Gimenes G. Bullying, sleep/wake patterns and subjective sleep disorders: findings from a cross-sectional survey. *Chronobiol Int*. 2014 May;31(4):542-53.
- Kuciene R, Dulskiene V. Associations of short sleep duration with prehypertension and hypertension among Lithuanian children and adolescents: a cross-sectional study. *BMC Public Health*. 2014 Mar 15;14:255.
- Kuriyan R, Thomas T, Sumithra S, Lokesh DP, Sheth NR, Joy R, Bhat S, Kurpad AV. Potential factors related to waist circumference in urban South Indian children. *Indian Pediatr*. 2012 Feb;49(2):124-8.
- Kuriyan R, Bhat S, Thomas T, Vaz M, Kurpad AV. Television viewing and sleep are associated with overweight among urban and semi-urban South Indian children. *Nutr J*. 2007 Sep 20;6:25.
- Kwon JA, Lee M, Yoo KB, Park EC. Does the duration and time of sleep increase the risk of allergic rhinitis? Results of the 6-year nationwide Korea youth risk behavior web-based survey. *PLoS One*. 2013;8(8):e72507.
- Lam JC, Mahone EM, Mason T, Scharf SM. The effects of napping on cognitive function in preschoolers. *J Dev Behav Pediatr*. 2011 Feb-Mar;32(2):90-7.
- Lazaratou H, Dikeos DG, Anagnostopoulos DC, Sbokou O, Soldatos CR. Sleep problems in adolescence. A study of senior high school students in Greece. *Eur Child Adolesc Psychiatry*. 2005 Jul;14(4):237-43.
- Lee YJ, Cho SJ, Cho IH, Kim SJ. Insufficient sleep and suicidality in adolescents. *Sleep*. 2012 Apr 1;35(4):455-60.
- Lehto JE, Uusitalo-Malmivaara L. Sleep-related factors: associations with poor attention and depressive symptoms. *Child Care Health Dev*. 2014 May;40(3):419-25.

- Lehto R, Ray C, Lahti-Koski M, Roos E. Health behaviors, waist circumference and waist-to-height ratio in children. *Eur J Clin Nutr.* 2011 Jul;65(7):841-8.
- Lemola S, Schwarz B, Siffert A. Interparental conflict and early adolescents' aggression: is irregular sleep a vulnerability factor? *J Adolesc.* 2012 Feb;35(1):97-105..
- Lemola S, Rääkkönen K, Scheier MF, Matthews KA, Pesonen AK, Heinonen K, Lahti J, Komsu N, Paavonen JE, Kajantie E. Sleep quantity, quality and optimism in children. *J Sleep Res.* 2011 Mar;20(1 Pt 1):12-20.
- Lewandowski AS, Palermo TM, De la Motte S, Fu R. Temporal daily associations between pain and sleep in adolescents with chronic pain versus healthy adolescents. *Pain.* 2010 Oct;151(1):220-5.
- Li S, Arguelles L, Jiang F, Chen W, Jin X, Yan C, Tian Y, Hong X, Qian C, Zhang J, Wang X, Shen X. Sleep, school performance, and a school-based intervention among school-aged children: a sleep series study in China. *PLoS One.* 2013 Jul 10;8(7):e67928.
- Li Y, Jin H, Owens JA, Hu C. The association between sleep and injury among school-aged children in rural China: a case-control study. *Sleep Med.* 2008 Jan;9(2):142-8.
- Lin WH, Yi CC. Unhealthy sleep practices, conduct problems, and daytime functioning during adolescence. *J Youth Adolesc.* 2015 Feb;44(2):431-46.
- Liu X, Hubbard JA, Fabes RA, Adam JB. Sleep disturbances and correlates of children with autism spectrum disorders. *Child Psychiatry Hum Dev.* 2006 Winter;37(2):179-91.
- Liu X. Sleep and adolescent suicidal behavior. *Sleep.* 2004 Nov 1;27(7):1351-8.
- Liu X, Uchiyama M, Okawa M, Kurita H. Prevalence and correlates of self-reported sleep problems among Chinese adolescents. *Sleep.* 2000 Feb 1;23(1):27-34.
- Loessl B, Valerius G, Kopasz M, Hornyak M, Riemann D, Voderholzer U. Are adolescents chronically sleep-deprived? An investigation of sleep habits of adolescents in the Southwest of Germany. *Child Care Health Dev.* 2008 Sep;34(5):549-56.
- Lytle LA, Pasch KE, Farbakhsh K. The relationship between sleep and weight in a sample of adolescents. *Obesity (Silver Spring).* 2011 Feb;19(2):324-31.
- Magee CA, Gordon R, Caputi P. Distinct developmental trends in sleep duration during early childhood. *Pediatrics.* 2014 Jun;133(6):e1561-7.
- Mak KK, Lee SL, Ho SY, Lo WS, Lam TH. Sleep and academic performance in Hong Kong adolescents. *J Sch Health.* 2012 Nov;82(11):522-7.
- Malow BA, Marzec ML, McGrew SG, Wang L, Henderson LM, Stone WL. Characterizing sleep in children with autism spectrum disorders: a multidimensional approach. *Sleep.* 2006 Dec;29(12):1563-71.
- Martinez-Gomez D, Eisenmann JC, Gomez-Martinez S, Hill EE, Zapatera B, Veiga OL, Marcos A; AFINOS Study Group. Sleep duration and emerging cardiometabolic risk markers in adolescents. The AFINOS study. *Sleep Med.* 2011 Dec;12(10):997-1002.
- Martinez-Gomez D, Moreno LA, Romeo J, Rey-López P, Castillo R, Cabero MJ, Vicente-Rodriguez G, Gutiérrez A, Veiga OL. Combined influence of lifestyle risk factors on body fat in Spanish adolescents--the Avena study. *Obes Facts.* 2011;4(2):105-11.
- Maski KP, Kothare SV. Sleep deprivation and neurobehavioral functioning in children. *Int J Psychophysiol.* 2013 Aug;89(2):259-64.
- Matamura M, Tochigi M, Usami S, Yonehara H, Fukushima M, Nishida A, Togo F, Sasaki T. Associations between sleep habits and mental health status and suicidality in a longitudinal survey of monozygotic twin adolescents. *J Sleep Res.* 2014 Jun;23(3):290-4.
- Matsushita M, Koyama A, Ushijima H, Mikami A, Katsumata Y, Kikuchi Y, Ichimi N, Jono T, Fujise N, Ikeda M. Sleep duration and its association with sleepiness and depression in ronin-sei" preparatory school students." *Asian J Psychiatr.* 2014 Jun;9:61-6.
- McDermott BM, Mamun AA, Najman JM, Williams GM, O'callaghan MJ, Bor W. Preschool children perceived by mothers as irregular eaters: physical and psychosocial predictors from a birth cohort study. *J Dev Behav Pediatr.* 2008 Jun;29(3):197-205.
- Meneilly J, Tremblay MS, Leduc G, Boyer C, Bélanger P, Leblanc AG, Borghese MM, Chaput JP. Objectively-measured sleep and its association with adiposity and physical activity in a sample of Canadian children. *J Sleep Res.* 2015 Apr;24(2):131-9.
- Meijer AM. Chronic sleep reduction, functioning at school and school achievement in preadolescents. *J Sleep Res.* 2008 Dec;17(4):395-405. Erratum in: *J Sleep Res.* 2009 Mar;18(1):144.
- Meininger JC, Gallagher MR, Eissa MA, Nguyen TQ, Chan W. Sleep duration and its association with ambulatory blood pressure in a school-based, diverse sample of adolescents. *Am J Hypertens.* 2014 Jul;27(7):948-55.
- Meldrum RC, Barnes JC, Hay C. Sleep deprivation, low self-control, and delinquency: a test of the strength model of self-control. *J Youth Adolesc.* 2015 Feb;44(2):465-77.
- Mercer PW, Merritt SL, Cowell JM. Differences in reported sleep need among adolescents. *J Adolesc Health.* 1998 Nov;23(5):259-63.
- Michels N, Clays E, De Buyzere M, Vanaelst B, De Henauw S, Sioen I. Children's sleep and autonomic function: low sleep quality has an impact on heart rate variability. *Sleep.* 2013 Dec 1;36(12):1939-46.
- Molfese DL, Ivanenko A, Key AF, Roman A, Molfese VJ, O'Brien LM, Gozal D, Kota S, Hudac CM. A one-hour sleep restriction impacts brain processing in young children across tasks: evidence from event-related potentials. *Dev Neuropsychol.* 2013;38(5):317-36.
- Monasta L, Batty GD, Cattaneo A, Lutje V, Ronfani L, Van Lenthe FJ, Brug J. Early-life determinants of overweight and obesity: a review of systematic reviews. *Obes Rev.* 2010 Oct;11(10):695-708.
- Montgomery-Downs HE, Gozal D. Sleep habits and risk factors for sleep-disordered breathing in infants and young toddlers in Louisville, Kentucky. *Sleep Med.* 2006 Apr;7(3):211-9.
- Moore M, Kirchner HL, Drotar D, Johnson N, Rosen C, Redline S. Correlates of adolescent sleep time and variability in sleep time: the role of individual and health



- related characteristics. *Sleep Med.* 2011 Mar;12(3):239-45.
- Moore M, Kirchner HL, Drotar D, Johnson N, Rosen C, Ancoli-Israel S, Redline S. Relationships among sleepiness, sleep time, and psychological functioning in adolescents. *J Pediatr Psychol.* 2009 Nov-Dec;34(10):1175-83.
- Morley BC, Scully ML, Niven PH, Okely AD, Baur LA, Pratt IS, Wakefield MA; NaSSDA Study Team. What factors are associated with excess body weight in Australian secondary school students? *Med J Aust.* 2012 Feb 20;196(3):189-92.
- Moseley L, Gradisar M. Evaluation of a school-based intervention for adolescent sleep problems. *Sleep.* 2009 Mar;32(3):334-41.
- Must A, Parisi SM. Sedentary behavior and sleep: paradoxical effects in association with childhood obesity. *Int J Obes (Lond).* 2009 Apr;33 Suppl 1:S82-6.
- Natal CL, Lourenço TJ, Silva LA, Boscolo RA, Silva A, Tufik S, Mello MT. Gender differences in the sleep habits of 11-13 year olds. *Rev Bras Psiquiatr.* 2009 Dec;31(4):358-61.
- Ng EP, Ng DK, Chan CH. Sleep duration, wake/sleep symptoms, and academic performance in Hong Kong Secondary School Children. *Sleep Breath.* 2009 Nov;13(4):357-67.
- Nixon GM, Thompson JM, Han DY, Becroft DM, Clark PM, Robinson E, Waldie KE, Wild CJ, Black PN, Mitchell EA. Short sleep duration in middle childhood: risk factors and consequences. *Sleep.* 2008 Jan;31(1):71-8.
- Noland H, Price JH, Dake J, Telljohann SK. Adolescents' sleep behaviors and perceptions of sleep. *J Sch Health.* 2009 May;79(5):224-30.
- O'Brien EM, Mindell JA. Sleep and risk-taking behavior in adolescents. *Behav Sleep Med.* 2005;3(3):113-33.
- O'Dea JA, Dibley MJ, Rankin NM. Low sleep and low socioeconomic status predict high body mass index: a 4-year longitudinal study of Australian schoolchildren. *Pediatr Obes.* 2012 Aug;7(4):295-303.
- Ohida T, Osaki Y, Doi Y, Tanihata T, Minowa M, Suzuki K, Wada K, Suzuki K, Kaneita Y. An epidemiologic study of self-reported sleep problems among Japanese adolescents. *Sleep.* 2004 Aug 1;27(5):978-85.
- Olds T, Maher C, Blunden S, Matricciani L. Normative data on the sleep habits of Australian children and adolescents. *Sleep.* 2010 Oct;33(10):1381-8.
- Olds T, Blunden S, Petkov J, Forchino F. The relationships between sex, age, geography and time in bed in adolescents: a meta-analysis of data from 23 countries. *Sleep Med Rev.* 2010 Dec;14(6):371-8.
- Olds TS, Maher CA, Matricciani L. Sleep duration or bedtime? Exploring the relationship between sleep habits and weight status and activity patterns. *Sleep.* 2011 Oct 1;34(10):1299-307.
- Ortega FB, Ruiz JR, Labayen I, Kwak L, Harro J, Oja L, Veidebaum T, Sjöström M. Sleep duration and activity levels in Estonian and Swedish children and adolescents. *Eur J Appl Physiol.* 2011 Oct;111(10):2615-23.
- Ortega FB, Chillón P, Ruiz JR, Delgado M, Albers U, Alvarez-Granda JL, Marcos A, Moreno LA, Castillo MJ. Sleep patterns in Spanish adolescents: associations with TV watching and leisure-time physical activity. *Eur J Appl Physiol.* 2010 Oct;110(3):563-73.
- Owens J. Classification and epidemiology of childhood sleep disorders. *Prim Care.* 2008 Sep;35(3):533-46, vii.
- Owens J, Maxim R, McGuinn M, Nobile C, Msall M, Alario A. Television-viewing habits and sleep disturbance in school children. *Pediatrics.* 1999 Sep;104(3):e27.
- Owens JA, Belon K, Moss P. Impact of delaying school start time on adolescent sleep, mood, and behavior. *Arch Pediatr Adolesc Med.* 2010 Jul;164(7):608-14.
- Owens JA, Fernando S, Mc Guinn M. Sleep disturbance and injury risk in young children. *Behav Sleep Med.* 2005;3(1):18-31.
- Paavonen EJ, Räikkönen K, Pesonen AK, Lahti J, Komsu N, Heinonen K, Järvenpää AL, Strandberg T, Kajantie E, Porkka-Heiskanen T. Sleep quality and cognitive performance in 8-year-old children. *Sleep Med.* 2010 Apr;11(4):386-92.
- Paavonen EJ, Vehkalahti K, Vanhala R, von Wendt L, Nieminen-von Wendt T, Aronen ET. Sleep in children with Asperger syndrome. *J Autism Dev Disord.* 2008 Jan;38(1):41-51.
- Paavonen EJ, Nieminen-von Wendt T, Vanhala R, Aronen ET, von Wendt L. Effectiveness of melatonin in the treatment of sleep disturbances in children with Asperger disorder. *J Child Adolesc Psychopharmacol.* 2003 Spring;13(1):83-95.
- Paciência I, Barros H, Araújo J, Ramos E. Association between sleep duration and blood pressure in adolescents. *Hypertens Res.* 2013 Aug;36(8):747-52.
- Paksarian D, Rudolph KE, He JP, Merikangas KR. School Start Time and Adolescent Sleep Patterns: Results From the U.S. National Comorbidity Survey--Adolescent Supplement. *Am J Public Health.* 2015 Jul;105(7):1351-7.
- Paraskakis E, Ntouros T, Ntokos M, Siavana O, Bitsori M, Galanakis E. Siesta and sleep patterns in a sample of adolescents in Greece. *Pediatr Int.* 2008 Oct;50(5):690-3.
- Park JH, Yoo JH, Kim SH. Associations between non-restorative sleep, short sleep duration and suicidality: findings from a representative sample of Korean adolescents. *Psychiatry Clin Neurosci.* 2013 Jan;67(1):28-34.
- Park S. The association between short sleep duration and body mass index among South Korean children and adolescents. *J Sch Nurs.* 2013 Apr;29(2):142-50.
- Park YM, Matsumoto K, Seo YJ, Shinkoda H. Sleep and chronotype for children in Japan. *Percept Mot Skills.* 1999 Jun;88(3 Pt 2):1315-29.
- Pasch KE, Latimer LA, Cance JD, Moe SG, Lytle LA. Longitudinal bi-directional relationships between sleep and youth substance use. *J Youth Adolesc.* 2012 Sep;41(9):1184-96.
- Pasch KE, Laska MN, Lytle LA, Moe SG. Adolescent sleep, risk behaviors, and depressive symptoms: are they linked? *Am J Health Behav.* 2010 Mar-Apr;34(2):237-48.
- Peach H, Gaultney JF, Reeve CL. Sleep characteristics, body mass index, and risk for hypertension in young adolescents. *J Youth Adolesc.* 2015 Feb;44(2):271-84.
- Perez-Chada D, Perez-Lloret S, Videla AJ, Cardinali D, Bergna MA, Fernández-Acquier M, Larrateguy L, Zabert

- GE, Drake C. Sleep disordered breathing and daytime sleepiness are associated with poor academic performance in teenagers. A study using the Pediatric Daytime Sleepiness Scale (PDSS). *Sleep*. 2007 Dec;30(12):1698-703.
- Perez-Lloret S, Videla AJ, Richaudeau A, Vigo D, Rossi M, Cardinali DP, Perez-Chada D. A multi-step pathway connecting short sleep duration to daytime somnolence, reduced attention, and poor academic performance: an exploratory cross-sectional study in teenagers. *J Clin Sleep Med*. 2013 May 15;9(5):469-73.
- Pesonen AK, Martikainen S, Kajantie E, Heinonen K, Wehkalampi K, Lahti J, Strandberg T, Räikkönen K. The associations between adolescent sleep, diurnal cortisol patterns and cortisol reactivity to dexamethasone suppression test. *Psychoneuroendocrinology*. 2014 Nov;49:150-60.
- Pesonen AK, Sjösten NM, Matthews KA, Heinonen K, Martikainen S, Kajantie E, Tammelin T, Eriksson JG, Strandberg T, Räikkönen K. Temporal associations between daytime physical activity and sleep in children. *PLoS One*. 2011;6(8):e22958.
- Randler C. Differences in sleep and circadian preference between Eastern and Western German adolescents. *Chronobiol Int*. 2008 Jul;25(4):565-75.
- Reid A, Maldonado CC, Baker FC. Sleep behavior of South African adolescents. *Sleep*. 2002 Jun 15;25(4):423-7.
- Rey-López JP, de Carvalho HB, de Moraes AC, Ruiz JR, Sjöström M, Marcos A, Polito A, Gottrand F, Manios Y, Kafatos A, Molnar D, Widhalm K, De Henauw S, Moreno LA; HELENA study. Sleep time and cardiovascular risk factors in adolescents: the HELENA (Healthy Lifestyle in Europe by Nutrition in Adolescence) study. *Sleep Med*. 2014 Jan;15(1):104-10.
- Roberts RE, Duong HT. The prospective association between sleep deprivation and depression among adolescents. *Sleep*. 2014 Feb 1;37(2):239-44.
- Russo PM, Bruni O, Lucidi F, Ferri R, Violani C. Sleep habits and circadian preference in Italian children and adolescents. *J Sleep Res*. 2007 Jun;16(2):163-9.
- Räikkönen K, Matthews KA, Pesonen AK, Pyhälä R, Paavonen EJ, Feldt K, Jones A, Phillips DI, Seckl JR, Heinonen K, Lahti J, Komsu N, Järvenpää AL, Eriksson JG, Strandberg TE, Kajantie E. Poor sleep and altered hypothalamic-pituitary-adrenocortical and sympatho-adrenal-medullary system activity in children. *J Clin Endocrinol Metab*. 2010 May;95(5):2254-61.
- Sadeh A, Gruber R, Raviv A. The effects of sleep restriction and extension on school-age children: what a difference an hour makes. *Child Dev*. 2003 Mar-Apr;74(2):444-55.
- Sadeh A, Gruber R, Raviv A. Sleep, neurobehavioral functioning, and behavior problems in school-age children. *Child Dev*. 2002 Mar-Apr;73(2):405-17.
- Schreck KA, Mulick JA, Smith AF. Sleep problems as possible predictors of intensified symptoms of autism. *Res Dev Disabil*. 2004 Jan-Feb;25(1):57-66.
- Shan XY, Xi B, Cheng H, Hou DQ, Wang Y, Mi J. Prevalence and behavioral risk factors of overweight and obesity among children aged 2-18 in Beijing, China. *Int J Pediatr Obes*. 2010 Oct;5(5):383-9.
- Shochat T, Cohen-Zion M, Tzischinsky O. Functional consequences of inadequate sleep in adolescents: a systematic review. *Sleep Med Rev*. 2014 Feb;18(1):75-87.
- Shochat T, Flint-Bretler O, Tzischinsky O. Sleep patterns, electronic media exposure and daytime sleep-related behaviours among Israeli adolescents. *Acta Paediatr*. 2010 Sep;99(9):1396-400.
- Short MA, Gradisar M, Lack LC, Wright HR, Dohnt H. The sleep patterns and well-being of Australian adolescents. *J Adolesc*. 2013 Feb;36(1):103-10.
- Short MA, Gradisar M, Lack LC, Wright HR. The impact of sleep on adolescent depressed mood, alertness and academic performance. *J Adolesc*. 2013 Dec;36(6):1025-33.
- Shur-Fen Gau S. Prevalence of sleep problems and their association with inattention/hyperactivity among children aged 6-15 in Taiwan. *J Sleep Res*. 2006 Dec;15(4):403-14. Erratum in: *J Sleep Res*. 2010 Jun;19(2):379. Shur-Fen, Gau Susan [corrected to Shur-Fen Gau, Susan].
- Sivertsen B, Harvey AG, Reichborn-Kjennerud T, Torgersen L, Ystrom E, Hysing M. Later emotional and behavioral problems associated with sleep problems in toddlers: a longitudinal study. *JAMA Pediatr*. 2015 Jun;169(6):575-82.
- Sivertsen B, Harvey AG, Lundervold AJ, Hysing M. Sleep problems and depression in adolescence: results from a large population-based study of Norwegian adolescents aged 16-18 years. *Eur Child Adolesc Psychiatry*. 2014 Aug;23(8):681-9.
- Skidmore PM, Howe AS, Polak MA, Wong JE, Lubransky A, Williams SM, Black KE. Sleep duration and adiposity in older adolescents from Otago, New Zealand: relationships differ between boys and girls and are independent of food choice. *Nutr J*. 2013 Sep 14;12:128.
- Souders MC, Mason TB, Valladares O, Bucan M, Levy SE, Mandell DS, Weaver TE, Pinto-Martin J. Sleep behaviors and sleep quality in children with autism spectrum disorders. *Sleep*. 2009 Dec;32(12):1566-78.
- Spilsbury JC, Storfer-Isser A, Drotar D, Rosen CL, Kirchner HL, Redline S. Effects of the home environment on school-aged children's sleep. *Sleep*. 2005 Nov;28(11):1419-27.
- Spilsbury JC, Storfer-Isser A, Drotar D, Rosen CL, Kirchner LH, Benham H, Redline S. Sleep behavior in an urban US sample of school-aged children. *Arch Pediatr Adolesc Med*. 2004 Oct;158(10):988-94.
- Spruyt K, Aitken RJ, So K, Charlton M, Adamson TM, Horne RS. Relationship between sleep/wake patterns, temperament and overall development in term infants over the first year of life. *Early Hum Dev*. 2008 May;84(5):289-96.
- Stea TH, Knutsen T, Torstveit MK. Association between short time in bed, health-risk behaviors and poor academic achievement among Norwegian adolescents. *Sleep Med*. 2014 Jun;15(6):666-71.
- Steele RM, van Sluijs EM, Cassidy A, Griffin SJ, Ekelund U. Targeting sedentary time or moderate- and vigorous-intensity activity: independent relations with adiposity in a population-based sample of 10-y-old British children. *Am J Clin Nutr*. 2009 Nov;90(5):1185-92.

- Steenari MR, Vuontela V, Paavonen EJ, Carlson S, Fjallberg M, Aronen E. Working memory and sleep in 6- to 13-year-old schoolchildren. *J Am Acad Child Adolesc Psychiatry*. 2003 Jan;42(1):85-92.
- Sugimori H, Yoshida K, Izuno T, Miyakawa M, Suka M, Sekine M, Yamagami T, Kagamimori S. Analysis of factors that influence body mass index from ages 3 to 6 years: A study based on the Toyama cohort study. *Pediatr Int*. 2004 Jun;46(3):302-10.
- Sun Y, Sekine M, Kagamimori S. Lifestyle and overweight among Japanese adolescents: the Toyama Birth Cohort Study. *J Epidemiol*. 2009;19(6):303-10.
- Suzuki H, Kaneita Y, Osaki Y, Minowa M, Kanda H, Suzuki K, Wada K, Hayashi K, Tanihata T, Ohida T. Clarification of the factor structure of the 12-item General Health Questionnaire among Japanese adolescents and associated sleep status. *Psychiatry Res*. 2011 Jun 30;188(1):138-46.
- Takemura T, Funaki K, Kanbayashi T, Kawamoto K, Tsutsui K, Saito Y, Aizawa R, Inomata S, Shimizu T. Sleep habits of students attending elementary schools, and junior and senior high schools in Akita prefecture. *Psychiatry Clin Neurosci*. 2002 Jun;56(3):241-2.
- Tatone-Tokuda F, Dubois L, Ramsay T, Girard M, Touchette E, Petit D, Montplaisir JY. Sex differences in the association between sleep duration, diet and body mass index: a birth cohort study. *J Sleep Res*. 2012 Aug;21(4):448-60.
- Taylor DJ, Jenni OG, Acebo C, Carskadon MA. Sleep tendency during extended wakefulness: insights into adolescent sleep regulation and behavior. *J Sleep Res*. 2005 Sep;14(3):239-44.
- Taylor RW, Williams SM, Farmer VL, Taylor BJ. The stability of sleep patterns in children 3 to 7 years of age. *J Pediatr*. 2015 Mar;166(3):697-702.e1.
- Teixeira LR, Fischer FM, de Andrade MM, Louzada FM, Nagai R. Sleep patterns of day-working, evening high-schooled adolescents of SÃ£o Paulo, Brazil. *Chronobiol Int*. 2004 Mar;21(2):239-52.
- Thorpe K, Staton S, Sawyer E, Pattinson C, Haden C, Smith S. Napping, development and health from 0 to 5 years: a systematic review. *Arch Dis Child*. 2015 Jul;100(7):615-22.
- Touchette E, Côté SM, Petit D, Liu X, Boivin M, Falissard B, Tremblay RE, Montplaisir JY. Short nighttime sleep-duration and hyperactivity trajectories in early childhood. *Pediatrics*. 2009 Nov;124(5):e985-93.
- Unalan D, Ozturk A, Ismailogullari S, Akgul N, Aksu M. The effect of sleep duration and quality on academical success of the elementary school children in Kayseri Turkey. *J Pak Med Assoc*. 2013 May;63(5):576-80.
- van der Vinne V, Zerbini G, Siersema A, Pieper A, Merrow M, Hut RA, Roenneberg T, Kantermann T. Timing of examinations affects school performance differently in early and late chronotypes. *J Biol Rhythms*. 2015 Feb;30(1):53-60.
- Vazsonyi AT, Harris C, Terveer AM, Pagava K, Phagava H, Michaud PA. Parallel mediation effects by sleep on the parental warmth-problem behavior links: evidence from national probability samples of Georgian and Swiss adolescents. *J Youth Adolesc*. 2015 Feb;44(2):331-45.
- Verrillo E, Bizzarri C, Cappa M, Bruni O, Pavone M, Ferri R, Cutrera R. Sleep characteristics in children with growth hormone deficiency. *Neuroendocrinology*. 2011;94(1):66-74.
- Voderholzer U, Piosczyk H, Holz J, Landmann N, Feige B, Loessl B, Kopasz M, Doerr JP, Riemann D, Nissen C. Sleep restriction over several days does not affect long-term recall of declarative and procedural memories in adolescents. *Sleep Med*. 2011 Feb;12(2):170-8.
- Vriend JL, Davidson FD, Corkum PV, Rusak B, Chambers CT, McLaughlin EN. Manipulating sleep duration alters emotional functioning and cognitive performance in children. *J Pediatr Psychol*. 2013 Nov;38(10):1058-69.
- Waldie KE, Thompson JM, Mia Y, Murphy R, Wall C, Mitchell EA. Risk factors for migraine and tension-type headache in 11 year old children. *J Headache Pain*. 2014 Sep 10;15:60.
- Wang H, Sekine M, Chen X, Yamagami T, Kagamimori S. Lifestyle at 3 years of age and quality of life (QOL) in first-year junior high school students in Japan: results of the Toyama Birth Cohort Study. *Qual Life Res*. 2008 Mar;17(2):257-65.
- Weiss A, Xu F, Storfer-Isser A, Thomas A, levers-Landis CE, Redline S. The association of sleep duration with adolescents' fat and carbohydrate consumption. *Sleep*. 2010 Sep;33(9):1201-9.
- Weissbluth M, Davis AT, Poncher J. Night waking in 4- to 8-month-old infants. *J Pediatr*. 1984 Mar;104(3):477-80.
- Weissbluth M, Brouillette RT, Liu K, Hunt CE. Sleep apnea, sleep duration, and infant temperament. *J Pediatr*. 1982 Aug;101(2):307-10.
- Weissbluth M. Sleep duration and infant temperament. *J Pediatr*. 1981 Nov;99(5):817-9.
- Wells JC, Hallal PC, Reichert FF, Menezes AM, Araújo CL, Victora CG. Sleep patterns and television viewing in relation to obesity and blood pressure: evidence from an adolescent Brazilian birth cohort. *Int J Obes (Lond)*. 2008 Jul;32(7):1042-9.
- Westerlund L, Ray C, Roos E. Associations between sleeping habits and food consumption patterns among 10-11-year-old children in Finland. *Br J Nutr*. 2009 Nov;102(10):1531-7.
- Winsler A, Deutsch A, Vorona RD, Payne PA, Szklo-Coxe M. Sleepless in Fairfax: the difference one more hour of sleep can make for teen hopelessness, suicidal ideation, and substance use. *J Youth Adolesc*. 2015 Feb;44(2):362-78.
- Yang CK, Kim JK, Patel SR, Lee JH. Age-related changes in sleep/wake patterns among Korean teenagers. *Pediatrics*. 2005 Jan;115(1 Suppl):250-6.
- Yen CF, King BH, Tang TC. The association between short and long nocturnal sleep durations and risky behaviours and the moderating factors in Taiwanese adolescents. *Psychiatry Res*. 2010 Aug 30;179(1):69-74.
- Yip T. The effects of ethnic/racial discrimination and sleep quality on depressive symptoms and self-esteem trajectories among diverse adolescents. *J Youth Adolesc*. 2015 Feb;44(2):419-30.
- Yokomaku A, Misao K, Omoto F, Yamagishi R, Tanaka K, Takada K, Kohyama J. A study of the association between

sleep habits and problematic behaviors in preschool children. *Chronobiol Int*. 2008 Jul;25(4):549-64.

## General Health

Amschler DH, McKenzie JF. Elementary students' sleep habits and teacher observations of sleep-related problems. *J Sch Health*. 2005 Feb;75(2):50-6.

Arman AR, Ay P, Fis NP, Ersu R, Topuzoglu A, Isik U, Berkem M. Association of sleep duration with socio-economic status and behavioural problems among schoolchildren. *Acta Paediatr*. 2011 Mar;100(3):420-4.

Bertelle V, Sevestre A, Laou-Hap K, Nagahapitiye MC, Sizun J. Sleep in the neonatal intensive care unit. *J Perinat Neonatal Nurs*. 2007 Apr-Jun;21(2):140-8; quiz 149-50. Review.

Bertelle V, Mabin D, Adrien J, Sizun J. Sleep of preterm neonates under developmental care or regular environmental conditions. *Early Hum Dev*. 2005 Jul;81(7):595-600.

Byars KC, Yolton K, Rausch J, Lanphear B, Beebe DW. Prevalence, patterns, and persistence of sleep problems in the first 3 years of life. *Pediatrics*. 2012 Feb;129(2):e276-84.

Chugh IM, Khanna P, Shah A. Nocturnal symptoms and sleep disturbances in clinically stable asthmatic children. *Asian Pac J Allergy Immunol*. 2006 Jun-Sep;24(2-3):135-42.

Daniel LC, Boergers J, Kopel SJ, Koinis-Mitchell D. Missed sleep and asthma morbidity in urban children. *Ann Allergy Asthma Immunol*. 2012 Jul;109(1):41-6.

El-Sheikh M, Buckhalt JA, Keller PS, Granger DA. Children's objective and subjective sleep disruptions: links with afternoon cortisol levels. *Health Psychol*. 2008 Jan;27(1):26-33.

Ertan P, Yilmaz O, Caglayan M, Sogut A, Aslan S, Yuksel H. Relationship of sleep quality and quality of life in children with monosymptomatic enuresis. *Child Care Health Dev*. 2009 Jul;35(4):469-74.

Gau SF. Neuroticism and sleep-related problems in adolescence. *Sleep*. 2000 Jun 15;23(4):495-502.

Gerber L. Sleep deprivation in children: a growing public health concern. *Nursing*. 2014 Apr;44(4):50-4. No abstract available.

Hiscock H, Sciberras E, Mensah F, Gerner B, Efron D, Khano S, Oberklaid F. Impact of a behavioural sleep intervention on symptoms and sleep in children with attention deficit hyperactivity disorder, and parental mental health: randomised controlled trial. *BMJ*. 2015 Jan 20;350:h68.

Kostyun RO, Milewski MD, Hafeez I. Sleep disturbance and neurocognitive function during the recovery from a sport-related concussion in adolescents. *Am J Sports Med*. 2015 Mar;43(3):633-40.

Lam LT, Yang L. Short duration of sleep and unintentional injuries among adolescents in China. *Am J Epidemiol*. 2007 Nov 1;166(9):1053-8.

Li Y, Jin H, Owens JA, Hu C. The association between sleep and injury among school-aged children in rural China: a case-control study. *Sleep Med*. 2008 Jan;9(2):142-8.

Lin WH, Yi CC. Unhealthy sleep practices, conduct problems, and daytime functioning during adolescence. *J Youth Adolesc*. 2015 Feb;44(2):431-46.

Magee CA, Lee JK, Vella SA. Bidirectional relationships between sleep duration and screen time in early childhood. *JAMA Pediatr*. 2014 May;168(5):465-70.

Magee CA, Gordon R, Caputi P. Distinct developmental trends in sleep duration during early childhood. *Pediatrics*. 2014 Jun;133(6):e1561-7.

Matricciani L, Blunden S, Rigney G, Williams MT, Olds TS. Children's sleep needs: is there sufficient evidence to recommend optimal sleep for children? *Sleep*. 2013 Apr 1;36(4):527-34.

Matthews KA, Hall M, Dahl RE. Sleep in healthy black and white adolescents. *Pediatrics*. 2014 May;133(5):e1189-96.

McHale SM, Kim JY, Kan M, Updegraff KA. Sleep in Mexican-American adolescents: social ecological and well-being correlates. *J Youth Adolesc*. 2011 Jun;40(6):666-79.

Milewski MD, Skaggs DL, Bishop GA, Pace JL, Ibrahim DA, Wren TA, Barzdukas A. Chronic lack of sleep is associated with increased sports injuries in adolescent athletes. *J Pediatr Orthop*. 2014 Mar;34(2):129-33.

Olds T, Blunden S, Petkov J, Forchino F. The relationships between sex, age, geography and time in bed in adolescents: a meta-analysis of data from 23 countries. *Sleep Med Rev*. 2010 Dec;14(6):371-8.

Owens JA, Fernando S, Mc Guinn M. Sleep disturbance and injury risk in young children. *Behav Sleep Med*. 2005;3(1):18-31.

Paavonen EJ, Nieminen-von Wendt T, Vanhala R, Aronen ET, von Wendt L. Effectiveness of melatonin in the treatment of sleep disturbances in children with Asperger disorder. *J Child Adolesc Psychopharmacol*. 2003 Spring;13(1):83-95.

Park YM, Matsumoto K, Seo YJ, Shinkoda H. Sleep and chronotype for children in Japan. *Percept Mot Skills*. 1999 Jun;88(3 Pt 2):1315-29.

Scott N, Blair PS, Emond AM, Fleming PJ, Humphreys JS, Henderson J, Gringras P. Sleep patterns in children with ADHD: a population-based cohort study from birth to 11 years. *J Sleep Res*. 2013 Apr;22(2):121-8.

Segura-Jiménez V, Carbonell-Baeza A, Keating XD, Ruiz JR, Castro-Piñero J. Association of sleep patterns with psychological positive health and health complaints in children and adolescents. *Qual Life Res*. 2015 Apr;24(4):885-95.

Serra-Negra JM, Paiva SM, Fulgêncio LB, Chavez BA, Lage CF, Pordeus IA. Environmental factors, sleep duration, and sleep bruxism in Brazilian schoolchildren: a case-control study. *Sleep Med*. 2014 Feb;15(2):236-9.

Shi Z, Taylor AW, Gill TK, Tuckerman J, Adams R, Martin J. Short sleep duration and obesity among Australian children. *BMC Public Health*. 2010 Oct 15;10:609.

Short MA, Gradisar M, Lack LC, Wright HR, Dohnt H. The sleep patterns and well-being of Australian adolescents. *J Adolesc*. 2013 Feb;36(1):103-10.

Smaldone A, Honig JC, Byrne MW. Sleepless in America: inadequate sleep and relationships to health and well-

being of our nation's children. *Pediatrics*. 2007 Feb;119 Suppl 1:S29-37.

Spruyt K, Alaribe CU, Nwabara OU. To sleep or not to sleep: a repeated daily challenge for African American children. *CNS Neurosci Ther*. 2015 Jan;21(1):23-31.

Stallones L, Beseler C, Chen P. Sleep patterns and risk of injury among adolescent farm residents. *Am J Prev Med*. 2006 Apr;30(4):300-4.

Valent F, Brusaferrero S, Barbone F. A case-crossover study of sleep and childhood injury. *Pediatrics*. 2001 Feb;107(2):E23.

van der Vinne V, Zerbini G, Siersema A, Pieper A, Merrow M, Hut RA, Roenneberg T, Kantermann T. Timing of examinations affects school performance differently in early and late chronotypes. *J Biol Rhythms*. 2015 Feb;30(1):53-60.

Vazsonyi AT, Harris C, Terveer AM, Pagava K, Phagava H, Michaud PA. Parallel mediation effects by sleep on the parental warmth-problem behavior links: evidence from national probability samples of Georgian and Swiss adolescents. *J Youth Adolesc*. 2015 Feb;44(2):331-45.

Wang H, Sekine M, Chen X, Yamagami T, Kagamimori S. Lifestyle at 3 years of age and quality of life (QOL) in first-year junior high school students in Japan: results of the Toyama Birth Cohort Study. *Qual Life Res*. 2008 Mar;17(2):257-65.

Willoughby MT, Angold A, Egger HL. Parent-reported attention-deficit/hyperactivity disorder symptomatology and sleep problems in a preschool-age pediatric clinic sample. *J Am Acad Child Adolesc Psychiatry*. 2008 Sep;47(9):1086-94.

## Human Performance

Abe T, Hagihara A, Nobutomo K. Sleep patterns and impulse control among Japanese junior high school students. *J Adolesc*. 2010 Oct;33(5):633-41.

Amschler DH, McKenzie JF. Elementary students' sleep habits and teacher observations of sleep-related problems. *J Sch Health*. 2005 Feb;75(2):50-6.

Anderson B, Storfer-Isser A, Taylor HG, Rosen CL, Redline S. Associations of executive function with sleepiness and sleep duration in adolescents. *Pediatrics*. 2009 Apr;123(4):e701-7.

Andrade MM, Benedito-Silva AA, Domenice S, Arnhold IJ, Menna-Barreto L. Sleep characteristics of adolescents: a longitudinal study. *J Adolesc Health*. 1993 Jul;14(5):401-6.

Arakawa M, Taira K, Tanaka H, Yamakawa K, Toguchi H, Kadekaru H, Yamamoto Y, Uezu E, Shirakawa S. A survey of junior high school students' sleep habit and lifestyle in Okinawa. *Psychiatry Clin Neurosci*. 2001 Jun;55(3):211-2.

Astill RG, Van der Heijden KB, Van Ijzendoorn MH, Van Someren EJ. Sleep, cognition, and behavioral problems in school-age children: a century of research meta-analyzed. *Psychol Bull*. 2012 Nov;138(6):1109-38.

Beebe DW, Ris MD, Kramer ME, Long E, Amin R. The association between sleep disordered breathing, academic grades, and cognitive and behavioral functioning among overweight subjects during middle to late childhood. *Sleep*. 2010 Nov;33(11):1447-56.

Beebe DW, Rose D, Amin R. Attention, learning, and arousal of experimentally sleep-restricted adolescents in a simulated classroom. *J Adolesc Health*. 2010 Nov;47(5):523-5.

Bell JF, Zimmerman FJ. Shortened nighttime sleep duration in early life and subsequent childhood obesity. *Arch Pediatr Adolesc Med*. 2010 Sep;164(9):840-5. Erratum in: *Arch Pediatr Adolesc Med*. 2010 Nov;164(11):1070.

Blunden SL, Beebe DW. The contribution of intermittent hypoxia, sleep debt and sleep disruption to daytime performance deficits in children: consideration of respiratory and non-respiratory sleep disorders. *Sleep Med Rev*. 2006 Apr;10(2):109-18.

Boto LR, Crispim JN, de Melo IS, Juvandes C, Rodrigues T, Azeredo P, Ferreira R. Sleep deprivation and accidental fall risk in children. *Sleep Med*. 2012 Jan;13(1):88-95.

Buckhalt JA, El-Sheikh M, Keller P. Children's sleep and cognitive functioning: race and socioeconomic status as moderators of effects. *Child Dev*. 2007 Jan-Feb;78(1):213-31.

Carskadon MA. Sleep's effects on cognition and learning in adolescence. *Prog Brain Res*. 2011;190:137-43.

Chung KF, Cheung MM. Sleep-wake patterns and sleep disturbance among Hong Kong Chinese adolescents. *Sleep*. 2008 Feb;31(2):185-94.

Cortese S, Konofal E, Yateman N, Mouren MC, Lecendreux M. Sleep and alertness in children with attention-deficit/hyperactivity disorder: a systematic review of the literature. *Sleep*. 2006 Apr;29(4):504-11. Review.

Countryman AJ, Saab PG, Llabre MM, Penedo FJ, McCalla JR, Schneiderman N. Cardiometabolic risk in adolescents: associations with physical activity, fitness, and sleep. *Ann Behav Med*. 2013 Feb;45(1):121-31.

Dahl RE. Biological, developmental, and neurobehavioral factors relevant to adolescent driving risks. *Am J Prev Med*. 2008 Sep;35(3 Suppl):S278-84.

Dahl RE, Ryan ND, Matty MK, Birmaher B, al-Shabbout M, Williamson DE, Kupfer DJ. Sleep onset abnormalities in depressed adolescents. *Biol Psychiatry*. 1996 Mar 15;39(6):400-10.

Davis AL, Avis KT, Schwebel DC. The effects of acute sleep restriction on adolescents' pedestrian safety in a virtual environment. *J Adolesc Health*. 2013 Dec;53(6):785-90.

El-Sheikh M, Buckhalt JA, Mark Cummings E, Keller P. Sleep disruptions and emotional insecurity are pathways of risk for children. *J Child Psychol Psychiatry*. 2007 Jan;48(1):88-96.

Escribano C, Díaz-Morales JF. Daily fluctuations in attention at school considering starting time and chronotype: an exploratory study. *Chronobiol Int*. 2014 Jul;31(6):761-9.

Fallone G, Acebo C, Seifer R, Carskadon MA. Experimental restriction of sleep opportunity in children: effects on teacher ratings. *Sleep*. 2005 Dec;28(12):1561-7.

Franco P, Seret N, Van Hees JN, Lanquart JP Jr, Groswasser J, Kahn A. Cardiac changes during sleep in sleep-deprived infants. *Sleep*. 2003 Nov 1;26(7):845-8.

Fukuda K, Sakashita Y. Sleeping pattern of kindergartners and nursery school children: function of daytime nap. *Percept Mot Skills*. 2002 Feb;94(1):219-28.

- Garmy P, Nyberg P, Jakobsson U. Sleep and television and computer habits of Swedish school-age children. *J Sch Nurs*. 2012 Dec;28(6):469-76.
- Gau SF. Neuroticism and sleep-related problems in adolescence. *Sleep*. 2000 Jun 15;23(4):495-502.
- Gau SS, Shang CY, Merikangas KR, Chiu YN, Soong WT, Cheng AT. Association between morningness-eveningness and behavioral/emotional problems among adolescents. *J Biol Rhythms*. 2007 Jun;22(3):268-74.
- Geiger A, Achermann P, Jenni OG. Association between sleep duration and intelligence scores in healthy children. *Dev Psychol*. 2010 Jul;46(4):949-54.
- Gibbs S, Wiltshire E, Elder D. Nocturnal sleep measured by actigraphy in children with Prader-Willi syndrome. *J Pediatr*. 2013 Apr;162(4):765-9.
- Gibson ES, Powles AC, Thabane L, O'Brien S, Molnar DS, Trajanovic N, Ogilvie R, Shapiro C, Yan M, Chilcott-Tanser L. "Sleepiness" is serious in adolescence: two surveys of 3235 Canadian students." *BMC Public Health*. 2006 May 2;6:116.
- Greenfeld M, Constantini S, Tauman R, Sivan Y. Sleep disturbances in children recovered from central nervous system neoplasms. *J Pediatr*. 2011 Aug;159(2):268-72.e1.
- Gruber R, Cassoff J, Frenette S, Wiebe S, Carrier J. Impact of sleep extension and restriction on children's emotional lability and impulsivity. *Pediatrics*. 2012 Nov;130(5):e1155-61.
- Gruber R, Wiebe S, Montecalvo L, Brunetti B, Amsel R, Carrier J. Impact of sleep restriction on neurobehavioral functioning of children with attention deficit hyperactivity disorder. *Sleep*. 2011 Mar 1;34(3):315-23.
- Gruber R, Laviolette R, Deluca P, Monson E, Cornish K, Carrier J. Short sleep duration is associated with poor performance on IQ measures in healthy school-age children. *Sleep Med*. 2010 Mar;11(3):289-94.
- Guérin N, Reinberg A, Testu F, Boulenguez S, Mechkouri M, Touitou Y. Role of school schedule, age, and parental socioeconomic status on sleep duration and sleepiness of Parisian children. *Chronobiol Int*. 2001 Nov;18(6):1005-17.
- Hansen M, Janssen I, Schiff A, Zee PC, Dubocovich ML. The impact of school daily schedule on adolescent sleep. *Pediatrics*. 2005 Jun;115(6):1555-61.
- Henderson JM, France KG, Owens JL, Blampied NM. Sleeping through the night: the consolidation of self-regulated sleep across the first year of life. *Pediatrics*. 2010 Nov;126(5):e1081-7.
- Hjorth MF, Chaput JP, Ritz C, Dalskov SM, Andersen R, Astrup A, Tetens I, Michaelsen KF, Sjodin A. Fatness predicts decreased physical activity and increased sedentary time, but not vice versa: support from a longitudinal study in 8- to 11-year-old children. *Int J Obes (Lond)*. 2014 Jul;38(7):959-65.
- Holm SM, Forbes EE, Ryan ND, Phillips ML, Tarr JA, Dahl RE. Reward-related brain function and sleep in pre/early pubertal and mid/late pubertal adolescents. *J Adolesc Health*. 2009 Oct;45(4):326-34.
- Ishihara K. The effect of 2-h sleep reduction by a delayed bedtime on daytime sleepiness in children. *Psychiatry Clin Neurosci*. 1999 Apr;53(2):113-5.
- Ishihara K, Miyake S. A longitudinal study of the development of daytime sleepiness in children. *Psychiatry Clin Neurosci*. 1998 Apr;52(2):178-81.
- Keller PS, El-Sheikh M, Buckhalt JA. Children's attachment to parents and their academic functioning: sleep disruptions as moderators of effects. *J Dev Behav Pediatr*. 2008 Dec;29(6):441-9.
- Kopasz M, Loessl B, Valerius G, Koenig E, Matthaes N, Hornyak M, Kloepfer C, Nissen C, Riemann D, Voderholzer U. No persisting effect of partial sleep curtailment on cognitive performance and declarative memory recall in adolescents. *J Sleep Res*. 2010 Mar;19(1 Pt 1):71-9.
- Kostyun RO, Milewski MD, Hafeez I. Sleep disturbance and neurocognitive function during the recovery from a sport-related concussion in adolescents. *Am J Sports Med*. 2015 Mar;43(3):633-40.
- Lam JC, Mahone EM, Mason T, Scharf SM. The effects of napping on cognitive function in preschoolers. *J Dev Behav Pediatr*. 2011 Feb-Mar;32(2):90-7.
- Lee JA, Park HS. Relation between sleep duration, overweight, and metabolic syndrome in Korean adolescents. *Nutr Metab Cardiovasc Dis*. 2014 Jan;24(1):65-71.
- Leprout R, Van Cauter E. Role of sleep and sleep loss in hormonal release and metabolism. *Endocr Dev*. 2010;17:11-21.
- Lewandowski AS, Palermo TM, De la Motte S, Fu R. Temporal daily associations between pain and sleep in adolescents with chronic pain versus healthy adolescents. *Pain*. 2010 Oct;151(1):220-5.
- Li S, Arguelles L, Jiang F, Chen W, Jin X, Yan C, Tian Y, Hong X, Qian C, Zhang J, Wang X, Shen X. Sleep, school performance, and a school-based intervention among school-aged children: a sleep series study in China. *PLoS One*. 2013 Jul 10;8(7):e67928.
- Lin WH, Yi CC. Unhealthy sleep practices, conduct problems, and daytime functioning during adolescence. *J Youth Adolesc*. 2015 Feb;44(2):431-46.
- Liu X. Sleep and adolescent suicidal behavior. *Sleep*. 2004 Nov 1;27(7):1351-8.
- Mak KK, Lee SL, Ho SY, Lo WS, Lam TH. Sleep and academic performance in Hong Kong adolescents. *J Sch Health*. 2012 Nov;82(11):522-7.
- Martikainen S, Pesonen AK, Feldt K, Jones A, Lahti J, Pyhälä R, Heinonen K, Kajantie E, Eriksson J, Räikkönen K. Poor sleep and cardiovascular function in children. *Hypertension*. 2011 Jul;58(1):16-21.
- Martinez-Gomez D, Eisenmann JC, Gomez-Martinez S, Hill EE, Zapatera B, Veiga OL, Marcos A; AFINOS Study Group. Sleep duration and emerging cardiometabolic risk markers in adolescents. The AFINOS study. *Sleep Med*. 2011 Dec;12(10):997-1002.
- Maski KP, Kothare SV. Sleep deprivation and neurobehavioral functioning in children. *Int J Psychophysiol*. 2013 Aug;89(2):259-64.
- Matsushita M, Koyama A, Ushijima H, Mikami A, Katsumata Y, Kikuchi Y, Ichimi N, Jono T, Fujise N, Ikeda M. Sleep duration and its association with sleepiness and

- depression in ronin-sei" preparatory school students." *Asian J Psychiatr.* 2014 Jun;9:61-6.
- McLaughlin Crabtree V, Beal Korhonen J, Montgomery-Downs HE, Faye Jones V, O'Brien LM, Gozal D. Cultural influences on the bedtime behaviors of young children. *Sleep Med.* 2005 Jul;6(4):319-24.
- Meijer AM. Chronic sleep reduction, functioning at school and school achievement in preadolescents. *J Sleep Res.* 2008 Dec;17(4):395-405. Erratum in: *J Sleep Res.* 2009 Mar;18(1):144.
- Mercer PW, Merritt SL, Cowell JM. Differences in reported sleep need among adolescents. *J Adolesc Health.* 1998 Nov;23(5):259-63.
- Mercier L, Pivik RT, Busby K. Sleep patterns in reading disabled children. *Sleep.* 1993 Apr;16(3):207-15. Review.
- Michels N, Clays E, De Buyzere M, Vanaelst B, De Henauw S, Sioen I. Children's sleep and autonomic function: low sleep quality has an impact on heart rate variability. *Sleep.* 2013 Dec 1;36(12):1939-46.
- Molfese DL, Ivanenko A, Key AF, Roman A, Molfese VJ, O'Brien LM, Gozal D, Kota S, Hudac CM. A one-hour sleep restriction impacts brain processing in young children across tasks: evidence from event-related potentials. *Dev Neuropsychol.* 2013;38(5):317-36.
- Ng EP, Ng DK, Chan CH. Sleep duration, wake/sleep symptoms, and academic performance in Hong Kong Secondary School Children. *Sleep Breath.* 2009 Nov;13(4):357-67.
- Nugent R, Althouse A, Yaqub Y, Nugent K, Raj R. Modeling the relation between obesity and sleep parameters in children referred for dietary weight reduction intervention. *South Med J.* 2014 Aug;107(8):473-80.
- Olds T, Blunden S, Petkov J, Forchino F. The relationships between sex, age, geography and time in bed in adolescents: a meta-analysis of data from 23 countries. *Sleep Med Rev.* 2010 Dec;14(6):371-8.
- Ortega FB, Chillón P, Ruiz JR, Delgado M, Albers U, Alvarez-Granda JL, Marcos A, Moreno LA, Castillo MJ. Sleep patterns in Spanish adolescents: associations with TV watching and leisure-time physical activity. *Eur J Appl Physiol.* 2010 Oct;110(3):563-73.
- Ortega FB, Ruiz JR, Castillo R, Chillón P, Labayen I, Martínez-Gómez D, Redondo C, Marcos A, Moreno LA; AVENA study group. Sleep duration and cognitive performance in adolescence. The AVENA study. *Acta Paediatr.* 2010 Mar;99(3):454-6.
- Owens JA, Belon K, Moss P. Impact of delaying school start time on adolescent sleep, mood, and behavior. *Arch Pediatr Adolesc Med.* 2010 Jul;164(7):608-14.
- Owens JA, Fernando S, Mc Guinn M. Sleep disturbance and injury risk in young children. *Behav Sleep Med.* 2005;3(1):18-31.
- Perez-Lloret S, Videla AJ, Richaudeau A, Vigo D, Rossi M, Cardinali DP, Perez-Chada D. A multi-step pathway connecting short sleep duration to daytime somnolence, reduced attention, and poor academic performance: an exploratory cross-sectional study in teenagers. *J Clin Sleep Med.* 2013 May 15;9(5):469-73.
- Perkinson-Gloor N, Lemola S, Grob A. Sleep duration, positive attitude toward life, and academic achievement: the role of daytime tiredness, behavioral persistence, and school start times. *J Adolesc.* 2013 Apr;36(2):311-8.
- Pesonen AK, Martikainen S, Kajantie E, Heinonen K, Wehkalampi K, Lahti J, Strandberg T, Räikkönen K. The associations between adolescent sleep, diurnal cortisol patterns and cortisol reactivity to dexamethasone suppression test. *Psychoneuroendocrinology.* 2014 Nov;49:150-60.
- Pizza F, Contardi S, Antognini AB, Zagoraiou M, Borrotti M, Mostacci B, Mondini S, Cirignotta F. Sleep quality and motor vehicle crashes in adolescents. *J Clin Sleep Med.* 2010 Feb 15;6(1):41-5.
- Reid A, Maldonado CC, Baker FC. Sleep behavior of South African adolescents. *Sleep.* 2002 Jun 15;25(4):423-7.
- Rey-López JP, de Carvalho HB, de Moraes AC, Ruiz JR, Sjöström M, Marcos A, Polito A, Gottrand F, Manios Y, Kafatos A, Molnar D, Widhalm K, De Henauw S, Moreno LA; HELENA study. Sleep time and cardiovascular risk factors in adolescents: the HELENA (Healthy Lifestyle in Europe by Nutrition in Adolescence) study. *Sleep Med.* 2014 Jan;15(1):104-10.
- Roberts RE, Roberts CR, Duong HT. Sleepless in adolescence: prospective data on sleep deprivation, health and functioning. *J Adolesc.* 2009 Oct;32(5):1045-57.
- Sadeh A, Gruber R, Raviv A. The effects of sleep restriction and extension on school-age children: what a difference an hour makes. *Child Dev.* 2003 Mar-Apr;74(2):444-55.
- Sadeh A, Gruber R, Raviv A. Sleep, neurobehavioral functioning, and behavior problems in school-age children. *Child Dev.* 2002 Mar-Apr;73(2):405-17.
- Sallinen BJ, Hassan F, Olszewski A, Maupin A, Hoban TF, Chervin RD, Woolford SJ. Longer weekly sleep duration predicts greater 3-month BMI reduction among obese adolescents attending a clinical multidisciplinary weight management program. *Obes Facts.* 2013;6(3):239-46.
- Salzarulo P, Fagioli I. Sleep for development or development for waking?--some speculations from a human perspective. *Behav Brain Res.* 1995 Jul-Aug;69(1-2):23-7. Review.
- Sampei M, Murata K, Dakeishi M, Wood DC. Cardiac autonomic hypofunction in preschool children with short nocturnal sleep. *Tohoku J Exp Med.* 2006 Mar;208(3):235-42.
- Segura-Jiménez V, Carbonell-Baeza A, Keating XD, Ruiz JR, Castro-Piñero J. Association of sleep patterns with psychological positive health and health complaints in children and adolescents. *Qual Life Res.* 2015 Apr;24(4):885-95.
- Shochat T, Flint-Bretler O, Tzischinsky O. Sleep patterns, electronic media exposure and daytime sleep-related behaviours among Israeli adolescents. *Acta Paediatr.* 2010 Sep;99(9):1396-400.
- Short MA, Gradisar M, Lack LC, Wright HR. The impact of sleep on adolescent depressed mood, alertness and academic performance. *J Adolesc.* 2013 Dec;36(6):1025-33.
- Spicuzza L, Sciuto C, Leonardi S, La Rosa M. Early occurrence of obstructive sleep apnea in infants and

children with cystic fibrosis. *Arch Pediatr Adolesc Med.* 2012 Dec;166(12):1165-9.

Stallones L, Beseler C, Chen P. Sleep patterns and risk of injury among adolescent farm residents. *Am J Prev Med.* 2006 Apr;30(4):300-4.

Steele RM, van Sluijs EM, Cassidy A, Griffin SJ, Ekelund U. Targeting sedentary time or moderate- and vigorous-intensity activity: independent relations with adiposity in a population-based sample of 10-y-old British children. *Am J Clin Nutr.* 2009 Nov;90(5):1185-92.

Steenari MR, Vuontela V, Paavonen EJ, Carlson S, Fjallberg M, Aronen E. Working memory and sleep in 6- to 13-year-old schoolchildren. *J Am Acad Child Adolesc Psychiatry.* 2003 Jan;42(1):85-92.

Taki Y, Hashizume H, Thyreau B, Sassa Y, Takeuchi H, Wu K, Kotozaki Y, Nouchi R, Asano M, Asano K, Fukuda H, Kawashima R. Sleep duration during weekdays affects hippocampal gray matter volume in healthy children. *Neuroimage.* 2012 Mar;60(1):471-5.

Teixeira LR, Fischer FM, Nagai R, Turte SL. Teen at work: the burden of a double shift on daily activities. *Chronobiol Int.* 2004;21(6):845-58.

Touchette E, Petit D, Séguin JR, Boivin M, Tremblay RE, Montplaisir JY. Associations between sleep duration patterns and behavioral/cognitive functioning at school entry. *Sleep.* 2007 Sep;30(9):1213-9.

Unalan D, Ozturk A, Ismailogullari S, Akgul N, Aksu M. The effect of sleep duration and quality on academical success of the elementary school children in Kayseri Turkey. *J Pak Med Assoc.* 2013 May;63(5):576-80.

Urschitz MS, Heine K, Brockmann PE, Peters T, Durst W, Poets CF, Wilhelm B. Subjective and objective daytime sleepiness in schoolchildren and adolescents: results of a community-based study. *Sleep Med.* 2013 Oct;14(10):1005-12.

Valent F, Brusaferrero S, Barbone F. A case-crossover study of sleep and childhood injury. *Pediatrics.* 2001 Feb;107(2):E23.

Verrillo E, Bizzarri C, Cappa M, Bruni O, Pavone M, Ferri R, Cutrera R. Sleep characteristics in children with growth hormone deficiency. *Neuroendocrinology.* 2011;94(1):66-74.

Voderholzer U, Piosczyk H, Holz J, Landmann N, Feige B, Loessel B, Kopasz M, Doerr JP, Riemann D, Nissen C. Sleep restriction over several days does not affect long-term recall of declarative and procedural memories in adolescents. *Sleep Med.* 2011 Feb;12(2):170-8.

Vriend JL, Davidson FD, Corkum PV, Rusak B, Chambers CT, McLaughlin EN. Manipulating sleep duration alters emotional functioning and cognitive performance in children. *J Pediatr Psychol.* 2013 Nov;38(10):1058-69.

Westerlund L, Ray C, Roos E. Associations between sleeping habits and food consumption patterns among 10-11-year-old children in Finland. *Br J Nutr.* 2009 Nov;102(10):1531-7.

Zhu Y, Li AM, Au CT, Kong AP, Zhang J, Wong CK, Chan JC, Wing YK. Association between sleep architecture and glucose tolerance in children and adolescents. *J Diabetes.* 2015 Jan;7(1):10-5.

## Immunologic Health

Berentzen NE, Smit HA, Bekkers MB, Brunekreef B, Koppelman GH, De Jongste JC, Kerkhof M, Van Rossem L, Wijga AH. Time in bed, sleep quality and associations with cardiometabolic markers in children: the Prevention and Incidence of Asthma and Mite Allergy birth cohort study. *J Sleep Res.* 2014 Feb;23(1):3-12.

Börnhorst C, Hense S, Ahrens W, Hebestreit A, Reisch L, Barba G, von Kries R, Bayer O; IDEFICS Consortium. From sleep duration to childhood obesity--what are the pathways? *Eur J Pediatr.* 2012 Jul;171(7):1029-38.

Chugh IM, Khanna P, Shah A. Nocturnal symptoms and sleep disturbances in clinically stable asthmatic children. *Asian Pac J Allergy Immunol.* 2006 Jun-Sep;24(2-3):135-42.

Countryman AJ, Saab PG, Llabre MM, Penedo FJ, McCalla JR, Schneiderman N. Cardiometabolic risk in adolescents: associations with physical activity, fitness, and sleep. *Ann Behav Med.* 2013 Feb;45(1):121-31.

Daniel LC, Boergers J, Kopel SJ, Koinis-Mitchell D. Missed sleep and asthma morbidity in urban children. *Ann Allergy Asthma Immunol.* 2012 Jul;109(1):41-6.

El-Sheikh M, Buckhalt JA, Granger DA, Erath SA, Acebo C. The association between children's sleep disruption and salivary interleukin-6. *J Sleep Res.* 2007 Jun;16(2):188-97.

Kieckhefer GM, Ward TM, Tsai SY, Lentz MJ. Nighttime sleep and daytime nap patterns in school age children with and without asthma. *J Dev Behav Pediatr.* 2008 Oct;29(5):338-44.

Martinez-Gomez D, Eisenmann JC, Gomez-Martinez S, Hill EE, Zapatera B, Veiga OL, Marcos A; AFINOS Study Group. Sleep duration and emerging cardiometabolic risk markers in adolescents. The AFINOS study. *Sleep Med.* 2011 Dec;12(10):997-1002.

Moore M, Kirchner HL, Drotar D, Johnson N, Rosen C, Ancoli-Israel S, Redline S. Relationships among sleepiness, sleep time, and psychological functioning in adolescents. *J Pediatr Psychol.* 2009 Nov-Dec;34(10):1175-83.

Moore M, Kirchner HL, Drotar D, Johnson N, Rosen C, Redline S. Correlates of adolescent sleep time and variability in sleep time: the role of individual and health related characteristics. *Sleep Med.* 2011 Mar;12(3):239-45.

Pérez de Heredia F, Garaulet M, Gómez-Martínez S, Díaz LE, Wärnberg J, Androustos O, Michels N, Breidenassel C, Cuenca-García M, Huybrechts I, Gottrand F, Ferrari M, Santaliestra-Pasías AM, Kafatos A, Molnár D, Sjöström M, Widhalm K, Moreno LA, Marcos A; HELENA Study Group. Self-reported sleep duration, white blood cell counts and cytokine profiles in European adolescents: the HELENA study. *Sleep Med.* 2014 Oct;15(10):1251-8.

Spruyt K, Molfese DL, Gozal D. Sleep duration, sleep regularity, body weight, and metabolic homeostasis in school-aged children. *Pediatrics.* 2011 Feb;127(2):e345-52.

Tirosh E, Scher A, Sadeh A, Jaffe M, Lavie P. Sleep characteristics of asthmatics in the first four years of life: a comparative study. *Arch Dis Child.* 1993 Apr;68(4):481-3.



## Longevity

- Aishworiya R, Chan P, Kiing J, Chong SC, Laino AG, Tay SKh. Sleep behaviour in a sample of preschool children in Singapore. *Ann Acad Med Singapore*. 2012 Mar;41(3):99-104.
- Azadbakht L, Kelishadi R, Khodarahmi M, Qorbani M, Heshmat R, Motlagh ME, Taslimi M, Ardalan G. The association of sleep duration and cardiometabolic risk factors in a national sample of children and adolescents: the CASPIAN III study. *Nutrition*. 2013 Sep;29(9):1133-41.
- Barnes JC, Meldrum RC. The impact of sleep duration on adolescent development: a genetically informed analysis of identical twin pairs. *J Youth Adolesc*. 2015 Feb;44(2):489-506.
- Beebe DW, Lewin D, Zeller M, McCabe M, MacLeod K, Daniels SR, Amin R. Sleep in overweight adolescents: shorter sleep, poorer sleep quality, sleepiness, and sleep-disordered breathing. *J Pediatr Psychol*. 2007 Jan-Feb;32(1):69-79.
- Berentzen NE, Smit HA, Bekkers MB, Brunekreef B, Koppelman GH, De Jongste JC, Kerkhof M, Van Rossem L, Wijga AH. Time in bed, sleep quality and associations with cardiometabolic markers in children: the Prevention and Incidence of Asthma and Mite Allergy birth cohort study. *J Sleep Res*. 2014 Feb;23(1):3-12.
- Bibiloni Mdel M, Martinez E, Llull R, Juarez MD, Pons A, Tur JA. Prevalence and risk factors for obesity in Balearic Islands adolescents. *Br J Nutr*. 2010 Jan;103(1):99-106.
- Bonuck K, Chervin RD, Howe LD. Sleep-disordered breathing, sleep duration, and childhood overweight: a longitudinal cohort study. *J Pediatr*. 2015 Mar;166(3):632-9.
- Byars KC, Yolton K, Rausch J, Lanphear B, Beebe DW. Prevalence, patterns, and persistence of sleep problems in the first 3 years of life. *Pediatrics*. 2012 Feb;129(2):e276-84.
- Chung KF, Cheung MM. Sleep-wake patterns and sleep disturbance among Hong Kong Chinese adolescents. *Sleep*. 2008 Feb;31(2):185-94.
- Daniel LC, Boergers J, Kopel SJ, Koinis-Mitchell D. Missed sleep and asthma morbidity in urban children. *Ann Allergy Asthma Immunol*. 2012 Jul;109(1):41-6.
- Danielsen YS, Pallesen S, Stormark KM, Nordhus IH, Bjorvatn B. The relationship between school day sleep duration and body mass index in Norwegian children (aged 10-12). *Int J Pediatr Obes*. 2010 May 3;5(3):214-20.
- de Jong E, Stocks T, Visscher TL, HiraSing RA, Seidell JC, Renders CM. Association between sleep duration and overweight: the importance of parenting. *Int J Obes (Lond)*. 2012 Oct;36(10):1278-84.
- Do YK, Shin E, Bautista MA, Foo K. The associations between self-reported sleep duration and adolescent health outcomes: what is the role of time spent on Internet use? *Sleep Med*. 2013 Feb;14(2):195-200.
- Drescher AA, Goodwin JL, Silva GE, Quan SF. Caffeine and screen time in adolescence: associations with short sleep and obesity. *J Clin Sleep Med*. 2011 Aug 15;7(4):337-42.
- Eaton DK, McKnight-Eily LR, Lowry R, Perry GS, Presley-Cantrell L, Croft JB. Prevalence of insufficient, borderline, and optimal hours of sleep among high school students - United States, 2007. *J Adolesc Health*. 2010 Apr;46(4):399-401.
- Elsenburg LK, Corpeleijn E, van Sluijs EM, Atkin AJ. Clustering and correlates of multiple health behaviours in 9-10 year old children. *PLoS One*. 2014;9(6):e99498.
- Fitzgerald CT, Messias E, Buysse DJ. Teen sleep and suicidality: results from the youth risk behavior surveys of 2007 and 2009. *J Clin Sleep Med*. 2011 Aug 15;7(4):351-6.
- Franco P, Seret N, Van Hees JN, Lanquart JP Jr, Groswasser J, Kahn A. Cardiac changes during sleep in sleep-deprived infants. *Sleep*. 2003 Nov 1;26(7):845-8.
- Gau SS, Shang CY, Merikangas KR, Chiu YN, Soong WT, Cheng AT. Association between morningness-eveningness and behavioral/emotional problems among adolescents. *J Biol Rhythms*. 2007 Jun;22(3):268-74.
- Guo X, Zheng L, Li Y, Yu S, Liu S, Zhou X, Zhang X, Sun Z, Wang R, Sun Y. Association between sleep duration and hypertension among Chinese children and adolescents. *Clin Cardiol*. 2011 Dec;34(12):774-81.
- Guo X, Zheng L, Li Y, Yu S, Sun G, Yang H, Zhou X, Zhang X, Sun Z, Sun Y. Differences in lifestyle behaviors, dietary habits, and familial factors among normal-weight, overweight, and obese Chinese children and adolescents. *Int J Behav Nutr Phys Act*. 2012 Oct 2;9:120.
- Gupta R, Bhatia MS, Chhabra V, Sharma S, Dahiya D, Semalti K, Sapra R, Dua RS. Sleep patterns of urban school-going adolescents. *Indian Pediatr*. 2008 Mar;45(3):183-9.
- Hart CN, Cairns A, Jelalian E. Sleep and obesity in children and adolescents. *Pediatr Clin North Am*. 2011 Jun;58(3):715-33.
- Hjorth MF, Quist JS, Andersen R, Michaelsen KF, Tetens I, Astrup A, Chaput JP, Sjödin A. Change in sleep duration and proposed dietary risk factors for obesity in Danish school children. *Pediatr Obes*. 2014 Dec;9(6):e156-9.
- Jaffa T, Scott S, Hendriks JH, Shapiro CM. ABC of sleep disorders. *Sleep disorders in children*. *BMJ*. 1993 Mar 6;306(6878):640-3.
- Jang SI, Lee KS, Park EC. Relationship between current sleep duration and past suicidal ideation or attempt among Korean adolescents. *J Prev Med Public Health*. 2013 Nov;46(6):329-35.
- Kang SG, Lee YJ, Kim SJ, Lim W, Lee HJ, Park YM, Cho IH, Cho SJ, Hong JP. Weekend catch-up sleep is independently associated with suicide attempts and self-injury in Korean adolescents. *Compr Psychiatry*. 2014 Feb;55(2):319-25.
- Kjeldsen JS, Hjorth MF, Andersen R, Michaelsen KF, Tetens I, Astrup A, Chaput JP, Sjödin A. Short sleep duration and large variability in sleep duration are independently associated with dietary risk factors for obesity in Danish school children. *Int J Obes (Lond)*. 2014 Jan;38(1):32-9.
- Kleiser C, Schaffrath Rosario A, Mensink GB, Prinz-Langenohl R, Kurth BM. Potential determinants of obesity among children and adolescents in Germany: results from the cross-sectional KiGGS Study. *BMC Public Health*. 2009 Feb 2;9:46.

- Koren D, O'Sullivan KL, Mokhlesi B. Metabolic and glycemic sequelae of sleep disturbances in children and adults. *Curr Diab Rep.* 2015 Jan;15(1):562.
- Kuciene R, Dulskiene V. Associations of short sleep duration with prehypertension and hypertension among Lithuanian children and adolescents: a cross-sectional study. *BMC Public Health.* 2014 Mar 15;14:255.
- Kwon JA, Lee M, Yoo KB, Park EC. Does the duration and time of sleep increase the risk of allergic rhinitis? Results of the 6-year nationwide Korea youth risk behavior web-based survey. *PLoS One.* 2013;8(8):e72507.
- Lam LT, Yang L. Short duration of sleep and unintentional injuries among adolescents in China. *Am J Epidemiol.* 2007 Nov 1;166(9):1053-8. Epub 2007 Aug 13.
- Lazaratou H, Dikeos DG, Anagnostopoulos DC, Sbokou O, Soldatos CR. Sleep problems in adolescence. A study of senior high school students in Greece. *Eur Child Adolesc Psychiatry.* 2005 Jul;14(4):237-43.
- Lee JA, Park HS. Relation between sleep duration, overweight, and metabolic syndrome in Korean adolescents. *Nutr Metab Cardiovasc Dis.* 2014 Jan;24(1):65-71.
- Lee YJ, Cho SJ, Cho IH, Kim SJ. Insufficient sleep and suicidality in adolescents. *Sleep.* 2012 Apr 1;35(4):455-60.
- Li Y, Jin H, Owens JA, Hu C. The association between sleep and injury among school-aged children in rural China: a case-control study. *Sleep Med.* 2008 Jan;9(2):142-8.
- Liu X, Uchiyama M, Okawa M, Kurita H. Prevalence and correlates of self-reported sleep problems among Chinese adolescents. *Sleep.* 2000 Feb 1;23(1):27-34.
- Liu X. Sleep and adolescent suicidal behavior. *Sleep.* 2004 Nov 1;27(7):1351-8.
- Mak KK, Lee SL, Ho SY, Lo WS, Lam TH. Sleep and academic performance in Hong Kong adolescents. *J Sch Health.* 2012 Nov;82(11):522-7.
- Martikainen S, Pesonen AK, Feldt K, Jones A, Lahti J, Pyhälä R, Heinonen K, Kajantie E, Eriksson J, Räikkönen K. Poor sleep and cardiovascular function in children. *Hypertension.* 2011 Jul;58(1):16-21.
- Matamura M, Tochigi M, Usami S, Yonehara H, Fukushima M, Nishida A, Togo F, Sasaki T. Associations between sleep habits and mental health status and suicidality in a longitudinal survey of monozygotic twin adolescents. *J Sleep Res.* 2014 Jun;23(3):290-4.
- Matricciani LA, Olds TS, Blunden S, Rigney G, Williams MT. Never enough sleep: a brief history of sleep recommendations for children. *Pediatrics.* 2012 Mar;129(3):548-56.
- Mitchell JA, Rodriguez D, Schmitz KH, Audrain-McGovern J. Sleep duration and adolescent obesity. *Pediatrics.* 2013 May;131(5):e1428-34.
- Montgomery-Downs HE, Gozal D. Sleep habits and risk factors for sleep-disordered breathing in infants and young toddlers in Louisville, Kentucky. *Sleep Med.* 2006 Apr;7(3):211-9.
- Owens JA, Maxim R, Nobile C, McGuinn M, Msall M. Parental and self-report of sleep in children with attention-deficit/hyperactivity disorder. *Arch Pediatr Adolesc Med.* 2000 Jun;154(6):549-55.
- Ozturk A, Mazicioglu M, Poyrazoglu S, Cicek B, Gunay O, Kurtoglu S. The relationship between sleep duration and obesity in Turkish children and adolescents. *Acta Paediatr.* 2009 Apr;98(4):699-702.
- Paavonen EJ, Vehkalahti K, Vanhala R, von Wendt L, Nieminen-von Wendt T, Aronen ET. Sleep in children with Asperger syndrome. *J Autism Dev Disord.* 2008 Jan;38(1):41-51.
- Padez C, Mourao I, Moreira P, Rosado V. Long sleep duration and childhood overweight/obesity and body fat. *Am J Hum Biol.* 2009 May-Jun;21(3):371-6.
- Park JH, Yoo JH, Kim SH. Associations between non-restorative sleep, short sleep duration and suicidality: findings from a representative sample of Korean adolescents. *Psychiatry Clin Neurosci.* 2013 Jan;67(1):28-34.
- Pizza F, Contardi S, Antognini AB, Zagoraiou M, Borrotti M, Mostacci B, Mondini S, Cirignotta F. Sleep quality and motor vehicle crashes in adolescents. *J Clin Sleep Med.* 2010 Feb 15;6(1):41-5.
- Rey-López JP, de Carvalho HB, de Moraes AC, Ruiz JR, Sjöström M, Marcos A, Polito A, Gottrand F, Manios Y, Kafatos A, Molnar D, Widhalm K, De Henauw S, Moreno LA; HELENA study. Sleep time and cardiovascular risk factors in adolescents: the HELENA (Healthy Lifestyle in Europe by Nutrition in Adolescence) study. *Sleep Med.* 2014 Jan;15(1):104-10.
- Rutters F, Gerver WJ, Nieuwenhuizen AG, Verhoef SP, Westerterp-Plantenga MS. Sleep duration and body-weight development during puberty in a Dutch children cohort. *Int J Obes (Lond).* 2010 Oct;34(10):1508-14.
- Seicean A, Redline S, Seicean S, Kirchner HL, Gao Y, Sekine M, Zhu X, Storer-Isser A. Association between short sleeping hours and overweight in adolescents: results from a US Suburban High School survey. *Sleep Breath.* 2007 Dec;11(4):285-93.
- Shan XY, Xi B, Cheng H, Hou DQ, Wang Y, Mi J. Prevalence and behavioral risk factors of overweight and obesity among children aged 2-18 in Beijing, China. *Int J Pediatr Obes.* 2010 Oct;5(5):383-9.
- Sivertsen B, Harvey AG, Reichborn-Kjennerud T, Torgersen L, Ystrom E, Hysing M. Later emotional and behavioral problems associated with sleep problems in toddlers: a longitudinal study. *JAMA Pediatr.* 2015 Jun;169(6):575-82.
- Sivertsen B, Pallesen S, Stormark KM, BÅe T, Lundervold AJ, Hysing M. Delayed sleep phase syndrome in adolescents: prevalence and correlates in a large population based study. *BMC Public Health.* 2013 Dec 11;13:1163.
- Skidmore PM, Howe AS, Polak MA, Wong JE, Lubransky A, Williams SM, Black KE. Sleep duration and adiposity in older adolescents from Otago, New Zealand: relationships differ between boys and girls and are independent of food choice. *Nutr J.* 2013 Sep 14;12:128.
- Smaldone A, Honig JC, Byrne MW. Sleepless in America: inadequate sleep and relationships to health and well-being of our nation's children. *Pediatrics.* 2007 Feb;119 Suppl 1:S29-37.
- Souders MC, Mason TB, Valladares O, Bucan M, Levy SE, Mandell DS, Weaver TE, Pinto-Martin J. Sleep behaviors

- and sleep quality in children with autism spectrum disorders. *Sleep*. 2009 Dec;32(12):1566-78.
- Stein MA, Mendelsohn J, Obermeyer WH, Amromin J, Benca R. Sleep and behavior problems in school-aged children. *Pediatrics*. 2001 Apr;107(4):E60.
- Taveras EM, Rifas-Shiman SL, Oken E, Gunderson EP, Gillman MW. Short sleep duration in infancy and risk of childhood overweight. *Arch Pediatr Adolesc Med*. 2008 Apr;162(4):305-11.
- Thomas DA, Poole K, McArdle EK, Goodenough PC, Thompson J, Beardsmore CS, Simpson H. The effect of sleep deprivation on sleep states, breathing events, peripheral chemoresponsiveness and arousal propensity in healthy 3 month old infants. *Eur Respir J*. 1996 May;9(5):932-8.
- Tirosh E, Scher A, Sadeh A, Jaffe M, Lavie P. Sleep characteristics of asthmatics in the first four years of life: a comparative study. *Arch Dis Child*. 1993 Apr;68(4):481-3.
- Touchette E, Petit D, Tremblay RE, Boivin M, Falissard B, Genolini C, Montplaisir JY. Associations between sleep duration patterns and overweight/obesity at age 6. *Sleep*. 2008 Nov;31(11):1507-14.
- Touchette E, Petit D, Tremblay RE, Montplaisir JY. Risk factors and consequences of early childhood dyssomnias: New perspectives. *Sleep Med Rev*. 2009 Oct;13(5):355-61.
- Wang G, Xu G, Liu Z, Lu N, Ma R, Zhang E. Sleep patterns and sleep disturbances among Chinese school-aged children: prevalence and associated factors. *Sleep Med*. 2013 Jan;14(1):45-52.
- Weissbluth M, Brouillette RT, Liu K, Hunt CE. Sleep apnea, sleep duration, and infant temperament. *J Pediatr*. 1982 Aug;101(2):307-10.
- Winsler A, Deutsch A, Vorona RD, Payne PA, Szklo-Coxe M. Sleepless in Fairfax: the difference one more hour of sleep can make for teen hopelessness, suicidal ideation, and substance use. *J Youth Adolesc*. 2015 Feb;44(2):362-78.
- Wong WW, Ortiz CL, Lathan D, Moore LA, Konzelmann KL, Adolph AL, Smith EO, Butte NF. Sleep duration of underserved minority children in a cross-sectional study. *BMC Public Health*. 2013 Jul 12;13:648.
- Yang CK, Kim JK, Patel SR, Lee JH. Age-related changes in sleep/wake patterns among Korean teenagers. *Pediatrics*. 2005 Jan;115(1 Suppl):250-6.
- Yen CF, King BH, Tang TC. The association between short and long nocturnal sleep durations and risky behaviours and the moderating factors in Taiwanese adolescents. *Psychiatry Res*. 2010 Aug 30;179(1):69-74.
- Yen CF, Ko CH, Yen JY, Cheng CP. The multidimensional correlates associated with short nocturnal sleep duration and subjective insomnia among Taiwanese adolescents. *Sleep*. 2008 Nov;31(11):1515-25.
- Alfano CA, Pina AA, Zerr AA, Villalta IK. Pre-sleep arousal and sleep problems of anxiety-disordered youth. *Child Psychiatry Hum Dev*. 2010 Apr;41(2):156-67.
- Arman AR, Ay P, Fis NP, Ersu R, Topuzoglu A, Isik U, Berkem M. Association of sleep duration with socio-economic status and behavioural problems among schoolchildren. *Acta Paediatr*. 2011 Mar;100(3):420-4.
- Aronen ET, Paavonen EJ, Fjällberg M, Soininen M, Törrönen J. Sleep and psychiatric symptoms in school-age children. *J Am Acad Child Adolesc Psychiatry*. 2000 Apr;39(4):502-8.
- Asarnow LD, McGlinchey E, Harvey AG. The effects of bedtime and sleep duration on academic and emotional outcomes in a nationally representative sample of adolescents. *J Adolesc Health*. 2014 Mar;54(3):350-6.
- Astill RG, Van der Heijden KB, Van Ijzendoorn MH, Van Someren EJ. Sleep, cognition, and behavioral problems in school-age children: a century of research meta-analyzed. *Psychol Bull*. 2012 Nov;138(6):1109-38.
- Barnes JC, Meldrum RC. The impact of sleep duration on adolescent development: a genetically informed analysis of identical twin pairs. *J Youth Adolesc*. 2015 Feb;44(2):489-506.
- Baum KT, Desai A, Field J, Miller LE, Rausch J, Beebe DW. Sleep restriction worsens mood and emotion regulation in adolescents. *J Child Psychol Psychiatry*. 2014;55(2):180-90.
- Beebe DW, Ris MD, Kramer ME, Long E, Amin R. The association between sleep disordered breathing, academic grades, and cognitive and behavioral functioning among overweight subjects during middle to late childhood. *Sleep*. 2010 Nov;33(11):1447-56.
- Berger RH, Miller AL, Seifer R, Cares SR, LeBourgeois MK. Acute sleep restriction effects on emotion responses in 30- to 36-month-old children. *J Sleep Res*. 2012 Jun;21(3):235-46.
- Biggs SN, Lushington K, van den Heuvel CJ, Martin AJ, Kennedy JD. Inconsistent sleep schedules and daytime behavioral difficulties in school-aged children. *Sleep Med*. 2011 Sep;12(8):780-6.
- Burt J, Dube L, Thibault L, Gruber R. Sleep and eating in childhood: a potential behavioral mechanism underlying the relationship between poor sleep and obesity. *Sleep Med*. 2014 Jan;15(1):71-5.
- Capaldi li VF, Handwerker K, Richardson E, Stroud LR. Associations between sleep and cortisol responses to stress in children and adolescents: a pilot study. *Behav Sleep Med*. 2005;3(4):177-92.
- Carskadon MA. Sleep in adolescents: the perfect storm. *Pediatr Clin North Am*. 2011 Jun;58(3):637-47.
- Carvalho Bos S, Gomes A, Clemente V, Marques M, Pereira AT, Maia B, Soares MJ, Cabral AS, Macedo A, Gozal D, Azevedo MH. Sleep and behavioral/emotional problems in children: a population-based study. *Sleep Med*. 2009 Jan;10(1):66-74.
- Casoff J, Bhatti JA, Gruber R. The effect of sleep restriction on neurobehavioural functioning in normally developing children and adolescents: insights from the Attention, Behaviour and Sleep Laboratory. *Pathol Biol (Paris)*. 2014 Oct;62(5):319-31.

## Mental Health

- Accardo JA, Marcus CL, Leonard MB, Shults J, Meltzer LJ, Elia J. Associations between psychiatric comorbidities and sleep disturbances in children with attention-deficit/hyperactivity disorder. *J Dev Behav Pediatr*. 2012 Feb;33(2):97-105.

- Cortese S, Konofal E, Yateman N, Mouren MC, Lecendreux M. Sleep and alertness in children with attention-deficit/hyperactivity disorder: a systematic review of the literature. *Sleep*. 2006 Apr;29(4):504-11.
- Cortesi F, Giannotti F, Sebastiani T, Vagnoni C, Marioni P. Cosleeping versus solitary sleeping in children with bedtime problems: child emotional problems and parental distress. *Behav Sleep Med*. 2008;6(2):89-105.
- Countryman AJ, Saab PG, Llabre MM, Penedo FJ, McCalla JR, Schneiderman N. Cardiometabolic risk in adolescents: associations with physical activity, fitness, and sleep. *Ann Behav Med*. 2013 Feb;45(1):121-31.
- Dagys N, McGlinchey EL, Talbot LS, Kaplan KA, Dahl RE, Harvey AG. Double trouble? The effects of sleep deprivation and chronotype on adolescent affect. *J Child Psychol Psychiatry*. 2012 Jun;53(6):660-7.
- Dahl RE, Lewin DS. Pathways to adolescent health sleep regulation and behavior. *J Adolesc Health*. 2002 Dec;31(6 Suppl):175-84.
- Dahl RE, Ryan ND, Matty MK, Birmaher B, al-Shabbout M, Williamson DE, Kupfer DJ. Sleep onset abnormalities in depressed adolescents. *Biol Psychiatry*. 1996 Mar 15;39(6):400-10.
- Daniel LC, Boergers J, Kopel SJ, Koinis-Mitchell D. Missed sleep and asthma morbidity in urban children. *Ann Allergy Asthma Immunol*. 2012 Jul;109(1):41-6.
- Do YK, Shin E, Bautista MA, Foo K. The associations between self-reported sleep duration and adolescent health outcomes: what is the role of time spent on Internet use? *Sleep Med*. 2013 Feb;14(2):195-200.
- Doane LD, Thurston EC. Associations among sleep, daily experiences, and loneliness in adolescence: evidence of moderating and bidirectional pathways. *J Adolesc*. 2014 Feb;37(2):145-54.
- El-Sheikh M, Buckhalt JA, Mark Cummings E, Keller P. Sleep disruptions and emotional insecurity are pathways of risk for children. *J Child Psychol Psychiatry*. 2007 Jan;48(1):88-96.
- Ertan P, Yilmaz O, Caglayan M, Sogut A, Aslan S, Yuksel H. Relationship of sleep quality and quality of life in children with monosymptomatic enuresis. *Child Care Health Dev*. 2009 Jul;35(4):469-74.
- Fallone G, Acebo C, Seifer R, Carskadon MA. Experimental restriction of sleep opportunity in children: effects on teacher ratings. *Sleep*. 2005 Dec;28(12):1561-7.
- Fallone G, Acebo C, Arnedt JT, Seifer R, Carskadon MA. Effects of acute sleep restriction on behavior, sustained attention, and response inhibition in children. *Percept Mot Skills*. 2001 Aug;93(1):213-29.
- Fredriksen K, Rhodes J, Reddy R, Way N. Sleepless in Chicago: tracking the effects of adolescent sleep loss during the middle school years. *Child Dev*. 2004 Jan-Feb;75(1):84-95.
- Gau SS, Shang CY, Merikangas KR, Chiu YN, Soong WT, Cheng AT. Association between morningness-eveningness and behavioral/emotional problems among adolescents. *J Biol Rhythms*. 2007 Jun;22(3):268-74.
- Giannotti F, Cortesi F, Cerquiglini A, Miraglia D, Vagnoni C, Sebastiani T, Bernabei P. An investigation of sleep characteristics, EEG abnormalities and epilepsy in developmentally regressed and non-regressed children with autism. *J Autism Dev Disord*. 2008 Nov;38(10):1888-97.
- Gruber R, Cassoff J, Frenette S, Wiebe S, Carrier J. Impact of sleep extension and restriction on children's emotional lability and impulsivity. *Pediatrics*. 2012 Nov;130(5):e1155-61.
- Gruber R, Wiebe S, Montecalvo L, Brunetti B, Amsel R, Carrier J. Impact of sleep restriction on neurobehavioral functioning of children with attention deficit hyperactivity disorder. *Sleep*. 2011 Mar 1;34(3):315-23.
- Gruber R, Xi T, Frenette S, Robert M, Vannasinh P, Carrier J. Sleep disturbances in prepubertal children with attention deficit hyperactivity disorder: a home polysomnography study. *Sleep*. 2009 Mar;32(3):343-50.
- Gruber R, Sadeh A, Raviv A. Instability of sleep patterns in children with attention-deficit/hyperactivity disorder. *J Am Acad Child Adolesc Psychiatry*. 2000 Apr;39(4):495-501.
- Hansen M, Janssen I, Schiff A, Zee PC, Dubocovich ML. The impact of school daily schedule on adolescent sleep. *Pediatrics*. 2005 Jun;115(6):1555-61.
- Hiscock H, Sciberras E, Mensah F, Gerner B, Efron D, Khano S, Oberklaid F. Impact of a behavioural sleep intervention on symptoms and sleep in children with attention deficit hyperactivity disorder, and parental mental health: randomised controlled trial. *BMJ*. 2015 Jan 20;350:h68.
- Hodge D, Carollo TM, Lewin M, Hoffman CD, Sweeney DP. Sleep patterns in children with and without autism spectrum disorders: developmental comparisons. *Res Dev Disabil*. 2014 Jul;35(7):1631-8.
- Holley S, Hill CM, Stevenson J. An hour less sleep is a risk factor for childhood conduct problems. *Child Care Health Dev*. 2011 Jul;37(4):563-70.
- Honomichl RD, Goodlin-Jones BL, Burnham M, Gaylor E, Anders TF. Sleep patterns of children with pervasive developmental disorders. *J Autism Dev Disord*. 2002 Dec;32(6):553-61.
- Humphreys JS, Gringras P, Blair PS, Scott N, Henderson J, Fleming PJ, Emond AM. Sleep patterns in children with autistic spectrum disorders: a prospective cohort study. *Arch Dis Child*. 2014 Feb;99(2):114-8.
- Kang SG, Lee YJ, Kim SJ, Lim W, Lee HJ, Park YM, Cho IH, Cho SJ, Hong JP. Weekend catch-up sleep is independently associated with suicide attempts and self-injury in Korean adolescents. *Compr Psychiatry*. 2014 Feb;55(2):319-25.
- Keller PS, El-Sheikh M, Buckhalt JA. Children's attachment to parents and their academic functioning: sleep disruptions as moderators of effects. *J Dev Behav Pediatr*. 2008 Dec;29(6):441-9.
- Kelly RJ, El-Sheikh M. Reciprocal relations between children's sleep and their adjustment over time. *Dev Psychol*. 2014 Apr;50(4):1137-47.
- Kim HS, Ham OK, Kim JW, Park JY. Association between sleep duration and psychological health in overweight and obese children in Korea. *Nurs Health Sci*. 2012 Jun;14(2):238-43.
- Komada Y, Abe T, Okajima I, Asaoka S, Matsuura N, Usui A, Shirakawa S, Inoue Y. Short sleep duration and

- irregular bedtime are associated with increased behavioral problems among Japanese preschool-age children. *Tohoku J Exp Med.* 2011;224(2):127-36.
- Kouros CD, El-Sheikh M. Daily mood and sleep: reciprocal relations and links with adjustment problems. *J Sleep Res.* 2015 Feb;24(1):24-31.
- Kwon JA, Lee M, Yoo KB, Park EC. Does the duration and time of sleep increase the risk of allergic rhinitis? Results of the 6-year nationwide Korea youth risk behavior web-based survey. *PLoS One.* 2013;8(8):e72507.
- Lee YJ, Cho SJ, Cho IH, Kim SJ. Insufficient sleep and suicidality in adolescents. *Sleep.* 2012 Apr 1;35(4):455-60.
- Lehto JE, Uusitalo-Malmivaara L. Sleep-related factors: associations with poor attention and depressive symptoms. *Child Care Health Dev.* 2014 May;40(3):419-25.
- Lewandowski AS, Palermo TM, De la Motte S, Fu R. Temporal daily associations between pain and sleep in adolescents with chronic pain versus healthy adolescents. *Pain.* 2010 Oct;151(1):220-5.
- Lin WH, Yi CC. Unhealthy sleep practices, conduct problems, and daytime functioning during adolescence. *J Youth Adolesc.* 2015 Feb;44(2):431-46.
- Liu X, Forbes EE, Ryan ND, Rofey D, Hannon TS, Dahl RE. Rapid eye movement sleep in relation to overweight in children and adolescents. *Arch Gen Psychiatry.* 2008 Aug;65(8):924-32.
- Liu X, Hubbard JA, Fabes RA, Adam JB. Sleep disturbances and correlates of children with autism spectrum disorders. *Child Psychiatry Hum Dev.* 2006 Winter;37(2):179-91.
- Liu X. Sleep and adolescent suicidal behavior. *Sleep.* 2004 Nov 1;27(7):1351-8.
- Liu X, Zhou H. Sleep duration, insomnia and behavioral problems among Chinese adolescents. *Psychiatry Res.* 2002 Aug 5;111(1):75-85.
- Lytle LA, Pasch KE, Farbakhsh K. The relationship between sleep and weight in a sample of adolescents. *Obesity (Silver Spring).* 2011 Feb;19(2):324-31.
- Magee CA, Gordon R, Caputi P. Distinct developmental trends in sleep duration during early childhood. *Pediatrics.* 2014 Jun;133(6):e1561-7.
- Malow BA, Marzec ML, McGrew SG, Wang L, Henderson LM, Stone WL. Characterizing sleep in children with autism spectrum disorders: a multidimensional approach. *Sleep.* 2006 Dec;29(12):1563-71.
- Maski KP, Kothare SV. Sleep deprivation and neurobehavioral functioning in children. *Int J Psychophysiol.* 2013 Aug;89(2):259-64.
- Matamura M, Tochigi M, Usami S, Yonehara H, Fukushima M, Nishida A, Togo F, Sasaki T. Associations between sleep habits and mental health status and suicidality in a longitudinal survey of monozygotic twin adolescents. *J Sleep Res.* 2014 Jun;23(3):290-4.
- Matsushita M, Koyama A, Ushijima H, Mikami A, Katsumata Y, Kikuchi Y, Ichimi N, Jono T, Fujise N, Ikeda M. Sleep duration and its association with sleepiness and depression in ronin-sei" preparatory school students." *Asian J Psychiatr.* 2014 Jun;9:61-6.
- McDermott BM, Mamun AA, Najman JM, Williams GM, O'callaghan MJ, Bor W. Preschool children perceived by mothers as irregular eaters: physical and psychosocial predictors from a birth cohort study. *J Dev Behav Pediatr.* 2008 Jun;29(3):197-205.
- Meltzer LJ, Mindell JA. Sleep and sleep disorders in children and adolescents. *Psychiatr Clin North Am.* 2006 Dec;29(4):1059-76
- Mercier L, Pivik RT, Busby K. Sleep patterns in reading disabled children. *Sleep.* 1993 Apr;16(3):207-15.
- Moore M, Kirchner HL, Drotar D, Johnson N, Rosen C, Redline S. Correlates of adolescent sleep time and variability in sleep time: the role of individual and health related characteristics. *Sleep Med.* 2011 Mar;12(3):239-45.
- Moore M, Kirchner HL, Drotar D, Johnson N, Rosen C, Ancoli-Israel S, Redline S. Relationships among sleepiness, sleep time, and psychological functioning in adolescents. *J Pediatr Psychol.* 2009 Nov-Dec;34(10):1175-83.
- Moseley L, Gradisar M. Evaluation of a school-based intervention for adolescent sleep problems. *Sleep.* 2009 Mar;32(3):334-41.
- Owens J. Classification and epidemiology of childhood sleep disorders. *Prim Care.* 2008 Sep;35(3):533-46, vii.
- Owens JA, Belon K, Moss P. Impact of delaying school start time on adolescent sleep, mood, and behavior. *Arch Pediatr Adolesc Med.* 2010 Jul;164(7):608-14.
- Owens JA, Fernando S, Mc Guinn M. Sleep disturbance and injury risk in young children. *Behav Sleep Med.* 2005;3(1):18-31.
- Owens JA, Maxim R, Nobile C, McGuinn M, Msall M. Parental and self-report of sleep in children with attention-deficit/hyperactivity disorder. *Arch Pediatr Adolesc Med.* 2000 Jun;154(6):549-55.
- Paavonen EJ, Räikkönen K, Lahti J, Komsu N, Heinonen K, Pesonen AK, Järvenpää AL, Strandberg T, Kajantie E, Porkka-Heiskanen T. Short sleep duration and behavioral symptoms of attention-deficit/hyperactivity disorder in healthy 7- to 8-year-old children. *Pediatrics.* 2009 May;123(5):e857-64.
- Paavonen EJ, Porkka-Heiskanen T, Lahikainen AR. Sleep quality, duration and behavioral symptoms among 5-6-year-old children. *Eur Child Adolesc Psychiatry.* 2009 Dec;18(12):747-54.
- Paavonen EJ, Vehkalahti K, Vanhala R, von Wendt L, Nieminen-von Wendt T, Aronen ET. Sleep in children with Asperger syndrome. *J Autism Dev Disord.* 2008 Jan;38(1):41-51
- Paavonen EJ, Nieminen-von Wendt T, Vanhala R, Aronen ET, von Wendt L. Effectiveness of melatonin in the treatment of sleep disturbances in children with Asperger disorder. *J Child Adolesc Psychopharmacol.* 2003 Spring;13(1):83-95.
- Paciência I, Barros H, Araújo J, Ramos E. Association between sleep duration and blood pressure in adolescents. *Hypertens Res.* 2013 Aug;36(8):747-52.
- Pantic I, Damjanovic A, Todorovic J, Topalovic D, Bojovic-Jovic D, Ristic S, Pantic S. Association between online social networking and depression in high school students: behavioral physiology viewpoint. *Psychiatr Danub.* 2012 Mar;24(1):90-3.

- Pasch KE, Laska MN, Lytle LA, Moe SG. Adolescent sleep, risk behaviors, and depressive symptoms: are they linked? *Am J Health Behav.* 2010 Mar-Apr;34(2):237-48.
- Perez-Chada D, Perez-Lloret S, Videla AJ, Cardinali D, Bergna MA, Fernández-Acquier M, Larrateguy L, Zabert GE, Drake C. Sleep disordered breathing and daytime sleepiness are associated with poor academic performance in teenagers. A study using the Pediatric Daytime Sleepiness Scale (PDSS). *Sleep.* 2007 Dec;30(12):1698-703.
- Perkinson-Gloor N, Lemola S, Grob A. Sleep duration, positive attitude toward life, and academic achievement: the role of daytime tiredness, behavioral persistence, and school start times. *J Adolesc.* 2013 Apr;36(2):311-8.
- Roberts RE, Duong HT. The prospective association between sleep deprivation and depression among adolescents. *Sleep.* 2014 Feb 1;37(2):239-44.
- Sadeh A, Gruber R, Raviv A. Sleep, neurobehavioral functioning, and behavior problems in school-age children. *Child Dev.* 2002 Mar-Apr;73(2):405-17.
- Scharf RJ, Demmer RT, Silver EJ, Stein RE. Nighttime sleep duration and externalizing behaviors of preschool children. *J Dev Behav Pediatr.* 2013 Jul-Aug;34(6):384-91.
- Schreck KA, Mulick JA, Smith AF. Sleep problems as possible predictors of intensified symptoms of autism. *Res Dev Disabil.* 2004 Jan-Feb;25(1):57-66.
- Scott N, Blair PS, Emond AM, Fleming PJ, Humphreys JS, Henderson J, Gringras P. Sleep patterns in children with ADHD: a population-based cohort study from birth to 11 years. *J Sleep Res.* 2013 Apr;22(2):121-8.
- Segura-Jiménez V, Carbonell-Baeza A, Keating XD, Ruiz JR, Castro-Piñero J. Association of sleep patterns with psychological positive health and health complaints in children and adolescents. *Qual Life Res.* 2015 Apr;24(4):885-95.
- Short MA, Gradisar M, Lack LC, Wright HR, Dohnt H. The sleep patterns and well-being of Australian adolescents. *J Adolesc.* 2013 Feb;36(1):103-10.
- Short MA, Gradisar M, Lack LC, Wright HR. The impact of sleep on adolescent depressed mood, alertness and academic performance. *J Adolesc.* 2013 Dec;36(6):1025-33.
- Shur-Fen Gau S. Prevalence of sleep problems and their association with inattention/hyperactivity among children aged 6-15 in Taiwan. *J Sleep Res.* 2006 Dec;15(4):403-14. Erratum in: *J Sleep Res.* 2010 Jun;19(2):379. Shur-Fen, Gau Susan [corrected to Shur-Fen Gau, Susan].
- Silva GE, Goodwin JL, Parthasarathy S, Sherrill DL, Vana KD, Drescher AA, Quan SF. Longitudinal association between short sleep, body weight, and emotional and learning problems in Hispanic and Caucasian children. *Sleep.* 2011 Sep 1;34(9):1197-205.
- Sivertsen B, Harvey AG, Reichborn-Kjennerud T, Torgersen L, Ystrom E, Hysing M. Later emotional and behavioral problems associated with sleep problems in toddlers: a longitudinal study. *JAMA Pediatr.* 2015 Jun;169(6):575-82.
- Sivertsen B, Harvey AG, Lundervold AJ, Hysing M. Sleep problems and depression in adolescence: results from a large population-based study of Norwegian adolescents aged 16-18 years. *Eur Child Adolesc Psychiatry.* 2014 Aug;23(8):681-9.
- Smaldone A, Honig JC, Byrne MW. Sleepless in America: inadequate sleep and relationships to health and well-being of our nation's children. *Pediatrics.* 2007 Feb;119 Suppl 1:S29-37.
- Souders MC, Mason TB, Valladares O, Bucan M, Levy SE, Mandell DS, Weaver TE, Pinto-Martin J. Sleep behaviors and sleep quality in children with autism spectrum disorders. *Sleep.* 2009 Dec;32(12):1566-78.
- Spruyt K, Gozal D. Sleep disturbances in children with attention-deficit/hyperactivity disorder. *Expert Rev Neurother.* 2011 Apr;11(4):565-77.
- Stein MA, Mendelsohn J, Obermeyer WH, Amromin J, Benca R. Sleep and behavior problems in school-aged children. *Pediatrics.* 2001 Apr;107(4):E60.
- Suzuki H, Kaneita Y, Osaki Y, Minowa M, Kanda H, Suzuki K, Wada K, Hayashi K, Tanihata T, Ohida T. Clarification of the factor structure of the 12-item General Health Questionnaire among Japanese adolescents and associated sleep status. *Psychiatry Res.* 2011 Jun 30;188(1):138-46.
- Tininenko JR, Fisher PA, Bruce J, Pears KC. Associations between sleep and inattentive/hyperactive problem behavior among foster and community children. *J Dev Behav Pediatr.* 2010 Oct;31(8):668-74.
- Touchette E, Petit D, Tremblay RE, Montplaisir JY. Risk factors and consequences of early childhood dyssomnias: New perspectives. *Sleep Med Rev.* 2009 Oct;13(5):355-61.
- Touchette E, Côté SM, Petit D, Liu X, Boivin M, Falissard B, Tremblay RE, Montplaisir JY. Short nighttime sleep-duration and hyperactivity trajectories in early childhood. *Pediatrics.* 2009 Nov;124(5):e985-93.
- Vazsonyi AT, Harris C, Terveer AM, Pagava K, Phagava H, Michaud PA. Parallel mediation effects by sleep on the parental warmth-problem behavior links: evidence from national probability samples of Georgian and Swiss adolescents. *J Youth Adolesc.* 2015 Feb;44(2):331-45.
- Vriend JL, Davidson FD, Corkum PV, Rusak B, Chambers CT, McLaughlin EN. Manipulating sleep duration alters emotional functioning and cognitive performance in children. *J Pediatr Psychol.* 2013 Nov;38(10):1058-69.
- Ward TM, Gay C, Alkon A, Anders TF, Lee KA. Nocturnal sleep and daytime nap behaviors in relation to salivary cortisol levels and temperament in preschool-age children attending child care. *Biol Res Nurs.* 2008 Jan;9(3):244-53.
- Wiggs L, Stores G. Behavioural treatment for sleep problems in children with severe learning disabilities and challenging daytime behaviour: effect on daytime behaviour. *J Child Psychol Psychiatry.* 1999 May;40(4):627-35.
- Willoughby MT, Angold A, Egger HL. Parent-reported attention-deficit/hyperactivity disorder symptomatology and sleep problems in a preschool-age pediatric clinic sample. *J Am Acad Child Adolesc Psychiatry.* 2008 Sep;47(9):1086-94.
- Winsler A, Deutsch A, Vorona RD, Payne PA, Szklo-Coxe M. Sleepless in Fairfax: the difference one more hour of sleep can make for teen hopelessness, suicidal ideation,

and substance use. *J Youth Adolesc.* 2015 Feb;44(2):362-78.

Yen CF, King BH, Tang TC. The association between short and long nocturnal sleep durations and risky behaviours and the moderating factors in Taiwanese adolescents. *Psychiatry Res.* 2010 Aug 30;179(1):69-74.

Yen CF, Ko CH, Yen JY, Cheng CP. The multidimensional correlates associated with short nocturnal sleep duration and subjective insomnia among Taiwanese adolescents. *Sleep.* 2008 Nov;31(11):1515-25.

Yip T. The effects of ethnic/racial discrimination and sleep quality on depressive symptoms and self-esteem trajectories among diverse adolescents. *J Youth Adolesc.* 2015 Feb;44(2):419-30.

Yokomaku A, Misao K, Omoto F, Yamagishi R, Tanaka K, Takada K, Kohyama J. A study of the association between sleep habits and problematic behaviors in preschool children. *Chronobiol Int.* 2008 Jul;25(4):549-64.

### Metabolic Health

Agras WS, Hammer LD, McNicholas F, Kraemer HC. Risk factors for childhood overweight: a prospective study from birth to 9.5 years. *J Pediatr.* 2004 Jul;145(1):20-5. Erratum in: *J Pediatr.* 2004 Sep;145(3):424.

Al-Disi D, Al-Daghri N, Khanam L, Al-Othman A, Al-Saif M, Sabico S, Chrousos G. Subjective sleep duration and quality influence diet composition and circulating adipocytokines and ghrelin levels in teen-age girls. *Endocr J.* 2010;57(10):915-23.

Al-Hazzaa HM, Musaiger AO, Abahussain NA, Al-Sobayel HI, Qahwaji DM. Lifestyle correlates of self-reported sleep duration among Saudi adolescents: a multicentre school-based cross-sectional study. *Child Care Health Dev.* 2014 Jul;40(4):533-42.

Altenburg TM, Chinapaw MJ, van der Knaap ET, Brug J, Manios Y, Singh AS. Longer sleep--slimmer kids: the ENERGY-project. *PLoS One.* 2013;8(3):e59522.

Androutsos O, Moschonis G, Mavrogianni C, Roma-Giannikou E, Chrousos GP, Kanaka-Gantenbein C, Manios Y. Identification of lifestyle patterns, including sleep deprivation, associated with insulin resistance in children: the Healthy Growth Study. *Eur J Clin Nutr.* 2014 Mar;68(3):344-9.

Appelhans BM, Fitzpatrick SL, Li H, Cail V, Waring ME, Schneider KL, Whited MC, Busch AM, Pagoto SL. The home environment and childhood obesity in low-income households: indirect effects via sleep duration and screen time. *BMC Public Health.* 2014 Nov 9;14:1160.

Arora T, Taheri S. Associations among late chronotype, body mass index and dietary behaviors in young adolescents. *Int J Obes (Lond).* 2015 Jan;39(1):39-44.

Arora T, Hussain S, Hubert Lam KB, Lily Yao G, Neil Thomas G, Taheri S. Exploring the complex pathways among specific types of technology, self-reported sleep duration and body mass index in UK adolescents. *Int J Obes (Lond).* 2013 Sep;37(9):1254-60.

Arora T, Hosseini-Araghi M, Bishop J, Yao GL, Thomas GN, Taheri S. The complexity of obesity in U.K. adolescents: relationships with quantity and type of technology, sleep

duration and quality, academic performance and aspiration. *Pediatr Obes.* 2013 Oct;8(5):358-66.

Azadbakht L, Kelishadi R, Khodarahmi M, Qorbani M, Heshmat R, Motlagh ME, Taslimi M, Ardalan G. The association of sleep duration and cardiometabolic risk factors in a national sample of children and adolescents: the CASPIAN III study. *Nutrition.* 2013 Sep;29(9):1133-41.

Ball GD, Lenk JM, Barbarich BN, Plotnikoff RC, Fishburne GJ, Mackenzie KA, Willows ND. Overweight children and adolescents referred for weight management: are they meeting lifestyle behaviour recommendations? *Appl Physiol Nutr Metab.* 2008 Oct;33(5):936-45.

Beebe DW, Ris MD, Kramer ME, Long E, Amin R. The association between sleep disordered breathing, academic grades, and cognitive and behavioral functioning among overweight subjects during middle to late childhood. *Sleep.* 2010 Nov;33(11):1447-56.

Beebe DW, Lewin D, Zeller M, McCabe M, MacLeod K, Daniels SR, Amin R. Sleep in overweight adolescents: shorter sleep, poorer sleep quality, sleepiness, and sleep-disordered breathing. *J Pediatr Psychol.* 2007 Jan-Feb;32(1):69-79.

Bell JF, Zimmerman FJ. Shortened nighttime sleep duration in early life and subsequent childhood obesity. *Arch Pediatr Adolesc Med.* 2010 Sep;164(9):840-5. Erratum in: *Arch Pediatr Adolesc Med.* 2010 Nov;164(11):1070.

Bibiloni Mdel M, Martinez E, Llull R, Juarez MD, Pons A, Tur JA. Prevalence and risk factors for obesity in Balearic Islands adolescents. *Br J Nutr.* 2010 Jan;103(1):99-106.

Bonuck K, Chervin RD, Howe LD. Sleep-disordered breathing, sleep duration, and childhood overweight: a longitudinal cohort study. *J Pediatr.* 2015 Mar;166(3):632-9.

Brandalize M, Pereira RF, Leite N, Filho GL, Louzada FM. Effect of morning school schedule on sleep and anthropometric variables in adolescents: a follow-up study. *Chronobiol Int.* 2011 Nov;28(9):779-85

Burt J, Dube L, Thibault L, Gruber R. Sleep and eating in childhood: a potential behavioral mechanism underlying the relationship between poor sleep and obesity. *Sleep Med.* 2014 Jan;15(1):71-5.

Börnhorst C, Hense S, Ahrens W, Hebestreit A, Reisch L, Barba G, von Kries R, Bayer O; IDEFICS Consortium. From sleep duration to childhood obesity--what are the pathways? *Eur J Pediatr.* 2012 Jul;171(7):1029-38.

Calamaro CJ, Park S, Mason TB, Marcus CL, Weaver TE, Pack A, Ratcliffe SJ. Shortened sleep duration does not predict obesity in adolescents. *J Sleep Res.* 2010 Dec;19(4):559-66.

Carrillo-Larco RM, Bernabé-Ortiz A, Miranda JJ. Short sleep duration and childhood obesity: cross-sectional analysis in Peru and patterns in four developing countries. *PLoS One.* 2014;9(11):e112433.

Casazza K, Hanks LJ, Fernandez JR. Shorter sleep may be a risk factor for impaired bone mass accrual in childhood. *J Clin Densitom.* 2011 Oct-Dec;14(4):453-7.

Casoff J, Bhatti JA, Gruber R. The effect of sleep restriction on neurobehavioural functioning in normally developing children and adolescents: insights from the Attention,

- Behaviour and Sleep Laboratory. *Pathol Biol (Paris)*. 2014 Oct;62(5):319-31.
- Cespedes EM, Rifas-Shiman SL, Redline S, Gillman MW, Peña MM, Taveras EM. Longitudinal associations of sleep curtailment with metabolic risk in mid-childhood. *Obesity (Silver Spring)*. 2014 Dec;22(12):2586-92.
- Chamorro R, Algarín C, Garrido M, Causa L, Held C, Lozoff B, Peirano P. Night time sleep macrostructure is altered in otherwise healthy 10-year-old overweight children. *Int J Obes (Lond)*. 2014 Aug;38(8):1120-5.
- Chaput JP, Lambert M, Gray-Donald K, McGrath JJ, Tremblay MS, O'Loughlin J, Tremblay A. Short sleep duration is independently associated with overweight and obesity in Quebec children. *Can J Public Health*. 2011 Sep-Oct;102(5):369-74.
- Chaput JP, Brunet M, Tremblay A. Relationship between short sleeping hours and childhood overweight/obesity: results from the 'Québec en Forme' Project. *Int J Obes (Lond)*. 2006 Jul;30(7):1080-5.
- Chen X, Beydoun MA, Wang Y. Is sleep duration associated with childhood obesity? A systematic review and meta-analysis. *Obesity (Silver Spring)*. 2008 Feb;16(2):265-74.
- Cicek B, Ozturk A, Mazicioglu MM, Elmali F, Turp N, Kurtoglu S. The risk analysis of arm fat area in Turkish children and adolescents. *Ann Hum Biol*. 2009 Jan-Feb;36(1):28-37.
- Countryman AJ, Saab PG, Llabre MM, Penedo FJ, McCalla JR, Schneiderman N. Cardiometabolic risk in adolescents: associations with physical activity, fitness, and sleep. *Ann Behav Med*. 2013 Feb;45(1):121-31.
- D'Aniello R, Troisi J, D'Amico O, Sangermano M, Massa G, Moccaldò A, Pierri L, Poeta M, Vajro P. Emerging pathomechanisms involved in obesity. *J Pediatr Gastroenterol Nutr*. 2015 Jan;60(1):113-9.
- Danielsen YS, Pallesen S, Stormark KM, Nordhus IH, Bjorvatn B. The relationship between school day sleep duration and body mass index in Norwegian children (aged 10-12). *Int J Pediatr Obes*. 2010 May 3;5(3):214-20.
- de Jong E, Stocks T, Visscher TL, HiraSing RA, Seidell JC, Renders CM. Association between sleep duration and overweight: the importance of parenting. *Int J Obes (Lond)*. 2012 Oct;36(10):1278-84.
- Dev DA, McBride BA, Fiese BH, Jones BL, Cho H; Behalf Of The Strong Kids Research Team. Risk factors for overweight/obesity in preschool children: an ecological approach. *Child Obes*. 2013 Oct;9(5):399-408.
- Diethelm K, Bolzenius K, Cheng G, Remer T, Buyken AE. Longitudinal associations between reported sleep duration in early childhood and the development of body mass index, fat mass index and fat free mass index until age 7. *Int J Pediatr Obes*. 2011 Jun;6(2-2):e114-23.
- Do YK, Shin E, Bautista MA, Foo K. The associations between self-reported sleep duration and adolescent health outcomes: what is the role of time spent on Internet use? *Sleep Med*. 2013 Feb;14(2):195-200.
- Drescher AA, Goodwin JL, Silva GE, Quan SF. Caffeine and screen time in adolescence: associations with short sleep and obesity. *J Clin Sleep Med*. 2011 Aug 15;7(4):337-42.
- Duncan JS, Schofield G, Duncan EK, Rush EC. Risk factors for excess body fatness in New Zealand children. *Asia Pac J Clin Nutr*. 2008;17(1):138-47.
- Eisenmann JC, Ekkekakis P, Holmes M. Sleep duration and overweight among Australian children and adolescents. *Acta Paediatr*. 2006 Aug;95(8):956-63.
- Ekstedt M, Nyberg G, Ingre M, Ekblom ö, Marcus C. Sleep, physical activity and BMI in six to ten-year-old children measured by accelerometry: a cross-sectional study. *Int J Behav Nutr Phys Act*. 2013 Jun 22;10:82.
- Fatima Y, Doi SA, Mamun AA. Longitudinal impact of sleep on overweight and obesity in children and adolescents: a systematic review and bias-adjusted meta-analysis. *Obes Rev*. 2015 Feb;16(2):137-49.
- Firouzi S, Poh BK, Ismail MN, Sadeghilar A. Sleep habits, food intake, and physical activity levels in normal and overweight and obese Malaysian children. *Obes Res Clin Pract*. 2014 Jan-Feb;8(1):e70-8.
- Fisher A, McDonald L, van Jaarsveld CH, Llewellyn C, Fildes A, Schrempft S, Wardle J. Sleep and energy intake in early childhood. *Int J Obes (Lond)*. 2014 Jul;38(7):926-9.
- Flint J, Kothare SV, Zihlif M, Suarez E, Adams R, Legido A, De Luca F. Association between inadequate sleep and insulin resistance in obese children. *J Pediatr*. 2007 Apr;150(4):364-9.
- Garaulet M, Ortega FB, Ruiz JR, Rey-López JP, Béghin L, Manios Y, Cuenca-García M, Plada M, Diethelm K, Kafatos A, Molnár D, Al-Tahan J, Moreno LA. Short sleep duration is associated with increased obesity markers in European adolescents: effect of physical activity and dietary habits. The HELENA study. *Int J Obes (Lond)*. 2011 Oct;35(10):1308-17.
- Golley RK, Maher CA, Matricciani L, Olds TS. Sleep duration or bedtime? Exploring the association between sleep timing behaviour, diet and BMI in children and adolescents. *Int J Obes (Lond)*. 2013 Apr;37(4):546-51.
- Gozal D, Kheirandish-Gozal L. Childhood obesity and sleep: relatives, partners, or both?--a critical perspective on the evidence. *Ann N Y Acad Sci*. 2012 Aug;1264:135-41.
- Graef DM, Janicke DM, McCrae CS. Sleep patterns of a primarily obese sample of treatment-seeking children. *J Clin Sleep Med*. 2014 Oct 15;10(10):1111-7.
- Guo X, Zheng L, Li Y, Yu S, Sun G, Yang H, Zhou X, Zhang X, Sun Z, Sun Y. Differences in lifestyle behaviors, dietary habits, and familial factors among normal-weight, overweight, and obese Chinese children and adolescents. *Int J Behav Nutr Phys Act*. 2012 Oct 2;9:120.
- Haines J, McDonald J, O'Brien A, Sherry B, Bottino CJ, Schmidt ME, Taveras EM. Healthy Habits, Happy Homes: randomized trial to improve household routines for obesity prevention among preschool-aged children. *JAMA Pediatr*. 2013 Nov;167(11):1072-9.
- Hart CN, Carskadon MA, Considine RV, Fava JL, Lawton J, Raynor HA, Jelalian E, Owens J, Wing R. Changes in children's sleep duration on food intake, weight, and leptin. *Pediatrics*. 2013 Dec;132(6):e1473-80.
- Hart CN, Cairns A, Jelalian E. Sleep and obesity in children and adolescents. *Pediatr Clin North Am*. 2011 Jun;58(3):715-33.



- Hart CN, Jelalian E. Shortened sleep duration is associated with pediatric overweight. *Behav Sleep Med.* 2008;6(4):251-67.
- Hassan F, Davis MM, Chervin RD. No independent association between insufficient sleep and childhood obesity in the National Survey of Children's Health. *J Clin Sleep Med.* 2011 Apr 15;7(2):153-7.
- Hense S, Pohlabein H, De Henauw S, Eiben G, Molnar D, Moreno LA, Barba G, Hadjigeorgiou C, Veidebaum T, Ahrens W. Sleep duration and overweight in European children: is the association modified by geographic region? *Sleep.* 2011 Jul 1;34(7):885-90.
- Hiscock H, Scalzo K, Canterford L, Wake M. Sleep duration and body mass index in 0-7-year olds. *Arch Dis Child.* 2011 Aug;96(8):735-9.
- Hjorth MF, Chaput JP, Ritz C, Dalskov SM, Andersen R, Astrup A, Tetens I, Michaelsen KF, Sjödin A. Fatness predicts decreased physical activity and increased sedentary time, but not vice versa: support from a longitudinal study in 8- to 11-year-old children. *Int J Obes (Lond).* 2014 Jul;38(7):959-65.
- Hjorth MF, Quist JS, Andersen R, Michaelsen KF, Tetens I, Astrup A, Chaput JP, Sjödin A. Change in sleep duration and proposed dietary risk factors for obesity in Danish school children. *Pediatr Obes.* 2014 Dec;9(6):e156-9.
- Iglayreger HB, Peterson MD, Liu D, Parker CA, Woolford SJ, Sallinen Gafka BJ, Hassan F, Gordon PM. Sleep duration predicts cardiometabolic risk in obese adolescents. *J Pediatr.* 2014 May;164(5):1085-1090.e1.
- Jarrin DC, McGrath JJ, Poirier P, Quality Cohort Collaborative Group. Autonomic dysfunction: a possible pathophysiological pathway underlying the association between sleep and obesity in children at-risk for obesity. *J Youth Adolesc.* 2015 Feb;44(2):285-97.
- Jarrin DC, McGrath JJ, Drake CL. Beyond sleep duration: distinct sleep dimensions are associated with obesity in children and adolescents. *Int J Obes (Lond).* 2013 Apr;37(4):552-8.
- Javaheri S, Storfer-Isser A, Rosen CL, Redline S. Association of short and long sleep durations with insulin sensitivity in adolescents. *J Pediatr.* 2011 Apr;158(4):617-23.
- Jenni OG, Molinari L, Caffisch JA, Largo RH. Sleep duration from ages 1 to 10 years: variability and stability in comparison with growth. *Pediatrics.* 2007 Oct;120(4):e769-76.
- Jiang F, Zhu S, Yan C, Jin X, Bandla H, Shen X. Sleep and obesity in preschool children. *J Pediatr.* 2009 Jun;154(6):814-8.
- Jiang YR, Spruyt K, Chen WJ, Shen XM, Jiang F. Somatic growth of lean children: the potential role of sleep. *World J Pediatr.* 2014 Aug;10(3):245-50.
- Jones CH, Pollard TM, Summerbell CD, Ball H. Could parental rules play a role in the association between short sleep and obesity in young children? *J Biosoc Sci.* 2014 May;46(3):405-18.
- Kim HS, Ham OK, Kim JW, Park JY. Association between sleep duration and psychological health in overweight and obese children in Korea. *Nurs Health Sci.* 2012 Jun;14(2):238-43.
- Kjeldsen JS, Hjorth MF, Andersen R, Michaelsen KF, Tetens I, Astrup A, Chaput JP, Sjödin A. Short sleep duration and large variability in sleep duration are independently associated with dietary risk factors for obesity in Danish school children. *Int J Obes (Lond).* 2014 Jan;38(1):32-9.
- Kleiser C, Schaffrath Rosario A, Mensink GB, Prinz-Langenohl R, Kurth BM. Potential determinants of obesity among children and adolescents in Germany: results from the cross-sectional KiGGS Study. *BMC Public Health.* 2009 Feb 2;9:46.
- Klingenberg L, Christensen LB, Hjorth MF, Zangenberg S, Chaput JP, Sjödin A, Mølgaard C, Michaelsen KF. No relation between sleep duration and adiposity indicators in 9-36 months old children: the SKOT cohort. *Pediatr Obes.* 2013 Feb;8(1):e14-8.
- Klingenberg L, Chaput JP, Holmbäck U, Jennum P, Astrup A, Sjödin A. Sleep restriction is not associated with a positive energy balance in adolescent boys. *Am J Clin Nutr.* 2012 Aug;96(2):240-8.
- Knutson KL. Sex differences in the association between sleep and body mass index in adolescents. *J Pediatr.* 2005 Dec;147(6):830-4.
- Koren D, O'Sullivan KL, Mokhlesi B. Metabolic and glycemic sequelae of sleep disturbances in children and adults. *Curr Diab Rep.* 2015 Jan;15(1):562.
- Koren D, Levitt Katz LE, Brar PC, Gallagher PR, Berkowitz RI, Brooks LJ. Sleep architecture and glucose and insulin homeostasis in obese adolescents. *Diabetes Care.* 2011 Nov;34(11):2442-7.
- Kuriyan R, Bhat S, Thomas T, Vaz M, Kurpad AV. Television viewing and sleep are associated with overweight among urban and semi-urban South Indian children. *Nutr J.* 2007 Sep 20;6:25.
- Landis AM, Parker KP, Dunbar SB. Sleep, hunger, satiety, food cravings, and caloric intake in adolescents. *J Nurs Scholarsh.* 2009;41(2):115-23.
- Lee JA, Park HS. Relation between sleep duration, overweight, and metabolic syndrome in Korean adolescents. *Nutr Metab Cardiovasc Dis.* 2014 Jan;24(1):65-71.
- Lehto R, Ray C, Lahti-Koski M, Roos E. Health behaviors, waist circumference and waist-to-height ratio in children. *Eur J Clin Nutr.* 2011 Jul;65(7):841-8.
- Leproult R, Van Cauter E. Role of sleep and sleep loss in hormonal release and metabolism. *Endocr Dev.* 2010;17:11-21.
- Liu J, Zhang A, Li L. Sleep duration and overweight/obesity in children: review and implications for pediatric nursing. *J Spec Pediatr Nurs.* 2012 Jul;17(3):193-204.
- Liu X, Forbes EE, Ryan ND, Rofey D, Hannon TS, Dahl RE. Rapid eye movement sleep in relation to overweight in children and adolescents. *Arch Gen Psychiatry.* 2008 Aug;65(8):924-32.
- Lumeng JC, Somashekar D, Appugliese D, Kaciroti N, Corwyn RF, Bradley RH. Shorter sleep duration is associated with increased risk for being overweight at ages 9 to 12 years. *Pediatrics.* 2007 Nov;120(5):1020-9.
- Lytte LA, Murray DM, Laska MN, Pasch KE, Anderson SE, Farbaksh K. Examining the longitudinal relationship

- between change in sleep and obesity risk in adolescents. *Health Educ Behav.* 2013 Jun;40(3):362-70.
- Lytle LA, Pasch KE, Farbakhsh K. The relationship between sleep and weight in a sample of adolescents. *Obesity (Silver Spring)*. 2011 Feb;19(2):324-31.
- Magee CA, Caputi P, Iverson DC. The longitudinal relationship between sleep duration and body mass index in children: a growth mixture modeling approach. *J Dev Behav Pediatr.* 2013 Apr;34(3):165-73.
- Mahler B, Kamperis K, Schroeder M, Frøkiær J, Djurhuus JC, Rittig S. Sleep deprivation induces excess diuresis and natriuresis in healthy children. *Am J Physiol Renal Physiol.* 2012 Jan 15;302(2):F236-43.
- Martinez SM, Greenspan LC, Butte NF, Gregorich SE, De Groat CL, Deardorff J, Penilla C, Pasch LA, Flores E, Tschann JM. Mother-reported sleep, accelerometer-estimated sleep and weight status in Mexican American children: sleep duration is associated with increased adiposity and risk for overweight/obese status. *J Sleep Res.* 2014 Jun;23(3):326-34.
- Martinez-Gomez D, Eisenmann JC, Gomez-Martinez S, Hill EE, Zapatera B, Veiga OL, Marcos A; AFINOS Study Group. Sleep duration and emerging cardiometabolic risk markers in adolescents. The AFINOS study. *Sleep Med.* 2011 Dec;12(10):997-1002.
- Martinez-Gomez D, Moreno LA, Romeo J, Rey-López P, Castillo R, Cabero MJ, Vicente-Rodriguez G, Gutiérrez A, Veiga OL. Combined influence of lifestyle risk factors on body fat in Spanish adolescents--the Avena study. *Obes Facts.* 2011;4(2):105-11.
- Matthews KA, Dahl RE, Owens JF, Lee L, Hall M. Sleep duration and insulin resistance in healthy black and white adolescents. *Sleep.* 2012 Oct 1;35(10):1353-8.
- Mcneil J, Tremblay MS, Leduc G, Boyer C, Bélanger P, Leblanc AG, Borghese MM, Chaput JP. Objectively-measured sleep and its association with adiposity and physical activity in a sample of Canadian children. *J Sleep Res.* 2015 Apr;24(2):131-9.
- Meininger JC, Gallagher MR, Eissa MA, Nguyen TQ, Chan W. Sleep duration and its association with ambulatory blood pressure in a school-based, diverse sample of adolescents. *Am J Hypertens.* 2014 Jul;27(7):948-55.
- Meng LP, Liu AL, Hu X, Zhang Q, Du SM, Fang HY, Ma J, Xu GF, Li Y, Guo HW, Du L, Ma GS. Report on childhood obesity in China (10): association of sleep duration with obesity. *Biomed Environ Sci.* 2012 Apr;25(2):133-40.
- Michels N, Verbeiren A, Ahrens W, De Henauw S, Sioen I. Children's sleep quality: relation with sleep duration and adiposity. *Public Health.* 2014 May;128(5):488-90.
- Miller AL, Kaciroti N, Lebourgeois MK, Chen YP, Sturza J, Lumeng JC. Sleep timing moderates the concurrent sleep duration-body mass index association in low-income preschool-age children. *Acad Pediatr.* 2014 Mar-Apr;14(2):207-13.
- Mitchell JA, Rodriguez D, Schmitz KH, Audrain-McGovern J. Sleep duration and adolescent obesity. *Pediatrics.* 2013 May;131(5):e1428-34.
- Monasta L, Batty GD, Cattaneo A, Lutje V, Ronfani L, Van Lenthe FJ, Brug J. Early-life determinants of overweight and obesity: a review of systematic reviews. *Obes Rev.* 2010 Oct;11(10):695-708.
- Moraleda-Cibrián M, O'Brien LM. Sleep duration and body mass index in children and adolescents with and without obstructive sleep apnea. *Sleep Breath.* 2014 Sep;18(3):555-61.
- Morley BC, Scully ML, Niven PH, Okely AD, Baur LA, Pratt IS, Wakefield MA; NaSSDA Study Team. What factors are associated with excess body weight in Australian secondary school students? *Med J Aust.* 2012 Feb 20;196(3):189-92.
- Must A, Parisi SM. Sedentary behavior and sleep: paradoxical effects in association with childhood obesity. *Int J Obes (Lond).* 2009 Apr;33 Suppl 1:S82-6.
- Nixon GM, Thompson JM, Han DY, Becroft DM, Clark PM, Robinson E, Waldie KE, Wild CJ, Black PN, Mitchell EA. Short sleep duration in middle childhood: risk factors and consequences. *Sleep.* 2008 Jan;31(1):71-8.
- Nugent R, Althouse A, Yaqub Y, Nugent K, Raj R. Modeling the relation between obesity and sleep parameters in children referred for dietary weight reduction intervention. *South Med J.* 2014 Aug;107(8):473-80.
- O'Dea JA, Dibley MJ, Rankin NM. Low sleep and low socioeconomic status predict high body mass index: a 4-year longitudinal study of Australian schoolchildren. *Pediatr Obes.* 2012 Aug;7(4):295-303.
- Ochiai H, Shirasawa T, Shimada N, Ohtsu T, Nishimura R, Morimoto A, Hoshino H, Tajima N, Kokaze A. Sleep duration and overweight among elementary schoolchildren: a population-based study in Japan. *Acta Med Okayama.* 2012;66(2):93-9.
- Olds T, Blunden S, Dollman J, Maher CA. Day type and the relationship between weight status and sleep duration in children and adolescents. *Aust N Z J Public Health.* 2010 Apr;34(2):165-71.
- Olds TS, Maher CA, Matricciani L. Sleep duration or bedtime? Exploring the relationship between sleep habits and weight status and activity patterns. *Sleep.* 2011 Oct 1;34(10):1299-307.
- Ozturk A, Mazicioglu M, Poyrazoglu S, Cicek B, Gunay O, Kurtoglu S. The relationship between sleep duration and obesity in Turkish children and adolescents. *Acta Paediatr.* 2009 Apr;98(4):699-702.
- Padez C, Mourao I, Moreira P, Rosado V. Long sleep duration and childhood overweight/obesity and body fat. *Am J Hum Biol.* 2009 May-Jun;21(3):371-6.
- Park S. The association between short sleep duration and body mass index among South Korean children and adolescents. *J Sch Nurs.* 2013 Apr;29(2):142-50.
- Park S. Association between short sleep duration and obesity among South Korean adolescents. *West J Nurs Res.* 2011 Mar;33(2):207-23.
- Prats-Puig A, Grau-Cabrera P, Riera-Pérez E, Cortés-Marina R, Fortea E, Soriano-Rodríguez P, de Zegher F, Ibáñez L, Bassols J, López-Bermejo A. Variations in the obesity genes FTO, TMEM18 and NRXN3 influence the vulnerability of children to weight gain induced by short sleep duration. *Int J Obes (Lond).* 2013 Feb;37(2):182-7.
- Reilly JJ, Armstrong J, Dorosty AR, Emmett PM, Ness A, Rogers I, Steer C, Sherriff A; Avon Longitudinal Study of

- Parents and Children Study Team. Early life risk factors for obesity in childhood: cohort study. *BMJ*. 2005 Jun 11;330(7504):1357.
- Reither EN, Krueger PM, Hale L, Reiter EM, Peppard PE. Ethnic variation in the association between sleep and body mass among US adolescents. *Int J Obes (Lond)*. 2014 Jul;38(7):944-9.
- Rey-López JP, de Carvalho HB, de Moraes AC, Ruiz JR, Sjöström M, Marcos A, Polito A, Gottrand F, Manios Y, Kafatos A, Molnar D, Widhalm K, De Henauw S, Moreno LA; HELENA study. Sleep time and cardiovascular risk factors in adolescents: the HELENA (Healthy Lifestyle in Europe by Nutrition in Adolescence) study. *Sleep Med*. 2014 Jan;15(1):104-10.
- Rutters F, Gerver WJ, Nieuwenhuizen AG, Verhoef SP, Westerterp-Plantenga MS. Sleep duration and body-weight development during puberty in a Dutch children cohort. *Int J Obes (Lond)*. 2010 Oct;34(10):1508-14.
- Sallinen BJ, Hassan F, Olszewski A, Maupin A, Hoban TF, Chervin RD, Woolford SJ. Longer weekly sleep duration predicts greater 3-month BMI reduction among obese adolescents attending a clinical multidisciplinary weight management program. *Obes Facts*. 2013;6(3):239-46.
- Sasaki A, Yorifuji T, Iwase T, Komatsu H, Takao S, Doi H. Is There Any Association between TV Viewing and Obesity in Preschool Children in Japan? *Acta Med Okayama*. 2010 Apr;64(2):137-42.
- Seegers V, Petit D, Falissard B, Vitaro F, Tremblay RE, Montplaisir J, Touchette E. Short sleep duration and body mass index: a prospective longitudinal study in preadolescence. *Am J Epidemiol*. 2011 Mar 15;173(6):621-9.
- Seicean A, Redline S, Seicean S, Kirchner HL, Gao Y, Sekine M, Zhu X, Storfer-Isser A. Association between short sleeping hours and overweight in adolescents: results from a US Suburban High School survey. *Sleep Breath*. 2007 Dec;11(4):285-93.
- Sekine M, Yamagami T, Handa K, Saito T, Nanri S, Kawaminami K, Tokui N, Yoshida K, Kagamimori S. A dose-response relationship between short sleeping hours and childhood obesity: results of the Toyama Birth Cohort Study. *Child Care Health Dev*. 2002 Mar;28(2):163-70.
- Shan XY, Xi B, Cheng H, Hou DQ, Wang Y, Mi J. Prevalence and behavioral risk factors of overweight and obesity among children aged 2-18 in Beijing, China. *Int J Pediatr Obes*. 2010 Oct;5(5):383-9.
- Shi Z, Taylor AW, Gill TK, Tuckerman J, Adams R, Martin J. Short sleep duration and obesity among Australian children. *BMC Public Health*. 2010 Oct 15;10:609.
- Shochat T, Cohen-Zion M, Tzischinsky O. Functional consequences of inadequate sleep in adolescents: a systematic review. *Sleep Med Rev*. 2014 Feb;18(1):75-87.
- Silva GE, Goodwin JL, Parthasarathy S, Sherrill DL, Vana KD, Drescher AA, Quan SF. Longitudinal association between short sleep, body weight, and emotional and learning problems in Hispanic and Caucasian children. *Sleep*. 2011 Sep 1;34(9):1197-205.
- Sivertsen B, Pallesen S, Sand L, Hysing M. Sleep and body mass index in adolescence: results from a large population-based study of Norwegian adolescents aged 16 to 19 years. *BMC Pediatr*. 2014 Aug 15;14:204.
- Skidmore PM, Howe AS, Polak MA, Wong JE, Lubransky A, Williams SM, Black KE. Sleep duration and adiposity in older adolescents from Otago, New Zealand: relationships differ between boys and girls and are independent of food choice. *Nutr J*. 2013 Sep 14;12:128.
- Sokolovic N, Kuriyan R, Kurpad AV, Thomas T. Sleep and birthweight predict visceral adiposity in overweight/obese children. *Pediatr Obes*. 2013 Jun;8(3):e41-4.
- Spruyt K, Molfese DL, Gozal D. Sleep duration, sleep regularity, body weight, and metabolic homeostasis in school-aged children. *Pediatrics*. 2011 Feb;127(2):e345-52.
- Steele RM, van Sluijs EM, Cassidy A, Griffin SJ, Ekelund U. Targeting sedentary time or moderate- and vigorous-intensity activity: independent relations with adiposity in a population-based sample of 10-y-old British children. *Am J Clin Nutr*. 2009 Nov;90(5):1185-92.
- Sugimori H, Yoshida K, Izuno T, Miyakawa M, Suka M, Sekine M, Yamagami T, Kagamimori S. Analysis of factors that influence body mass index from ages 3 to 6 years: A study based on the Toyama cohort study. *Pediatr Int*. 2004 Jun;46(3):302-10.
- Sun Y, Sekine M, Kagamimori S. Lifestyle and overweight among Japanese adolescents: the Toyama Birth Cohort Study. *J Epidemiol*. 2009;19(6):303-10.
- Sung V, Beebe DW, Vandyske R, Fenchel MC, Crimmins NA, Kirk S, Hiscock H, Amin R, Wake M. Does sleep duration predict metabolic risk in obese adolescents attending tertiary services? A cross-sectional study. *Sleep*. 2011 Jul 1;34(7):891-8.
- Taheri S. The link between short sleep duration and obesity: we should recommend more sleep to prevent obesity. *Arch Dis Child*. 2006 Nov;91(11):881-4.
- Tan E, Healey D, Gray AR, Galland BC. Sleep hygiene intervention for youth aged 10 to 18 years with problematic sleep: a before-after pilot study. *BMC Pediatr*. 2012 Dec 7;12:189.
- Tatone-Tokuda F, Dubois L, Ramsay T, Girard M, Touchette E, Petit D, Montplaisir JY. Sex differences in the association between sleep duration, diet and body mass index: a birth cohort study. *J Sleep Res*. 2012 Aug;21(4):448-60.
- Taveras EM, Gillman MW, Peña MM, Redline S, Rifas-Shiman SL. Chronic sleep curtailment and adiposity. *Pediatrics*. 2014 Jun;133(6):1013-22.
- Taveras EM, Rifas-Shiman SL, Oken E, Gunderson EP, Gillman MW. Short sleep duration in infancy and risk of childhood overweight. *Arch Pediatr Adolesc Med*. 2008 Apr;162(4):305-11.
- Tian Z, Ye T, Zhang X, Liu E, Wang W, Wang P, Liu G, Yang X, Hu G, Yu Z. Sleep duration and hyperglycemia among obese and nonobese children aged 3 to 6 years. *Arch Pediatr Adolesc Med*. 2010 Jan;164(1):46-52.
- Tikotzky L, DE Marcas G, Har-Toov J, Dollberg S, Bar-Haim Y, Sadeh A. Sleep and physical growth in infants during the first 6 months. *J Sleep Res*. 2010 Mar;19(1 Pt 1):103-10.

- Touchette E, Petit D, Tremblay RE, Boivin M, Falissard B, Genolini C, Montplaisir JY. Associations between sleep duration patterns and overweight/obesity at age 6. *Sleep*. 2008 Nov;31(11):1507-14.
- Vaezghasemi M, Lindkvist M, Ivarsson A, Eurenus E. Overweight and lifestyle among 13-15 year olds: a cross-sectional study in northern Sweden. *Scand J Public Health*. 2012 May;40(3):221-8.
- von Kries R, Toschke AM, Wurmser H, Sauerwald T, Koletzko B. Reduced risk for overweight and obesity in 5- and 6-y-old children by duration of sleep--a cross-sectional study. *Int J Obes Relat Metab Disord*. 2002 May;26(5):710-6.
- Wake M, Price A, Clifford S, Ukoumunne OC, Hiscock H. Does an intervention that improves infant sleep also improve overweight at age 6? Follow-up of a randomised trial. *Arch Dis Child*. 2011 Jun;96(6):526-32.
- Weiss A, Xu F, Storfer-Isser A, Thomas A, Ievers-Landis CE, Redline S. The association of sleep duration with adolescents' fat and carbohydrate consumption. *Sleep*. 2010 Sep;33(9):1201-9.
- Weiss R, Bremer AA, Lustig RH. What is metabolic syndrome, and why are children getting it? *Ann N Y Acad Sci*. 2013 Apr;1281:123-40.
- Wells JC, Hallal PC, Reichert FF, Menezes AM, AraÃjo CL, Victora CG. Sleep patterns and television viewing in relation to obesity and blood pressure: evidence from an adolescent Brazilian birth cohort. *Int J Obes (Lond)*. 2008 Jul;32(7):1042-9.
- Wheaton AG, Perry GS, Chapman DP, Croft JB. Self-reported sleep duration and weight-control strategies among U.S. high school students. *Sleep*. 2013 Aug 1;36(8):1139-45.
- Wing YK, Li SX, Li AM, Zhang J, Kong AP. The effect of weekend and holiday sleep compensation on childhood overweight and obesity. *Pediatrics*. 2009 Nov;124(5):e994-e1000.
- Wong WW, Ortiz CL, Lathan D, Moore LA, Konzelmann KL, Adolph AL, Smith EO, Butte NF. Sleep duration of underserved minority children in a cross-sectional study. *BMC Public Health*. 2013 Jul 12;13:648.
- Zhu Y, Li AM, Au CT, Kong AP, Zhang J, Wong CK, Chan JC, Wing YK. Association between sleep architecture and glucose tolerance in children and adolescents. *J Diabetes*. 2015 Jan;7(1):10-5.
